# Supplementary material for: Spatiotemporal heterogeneity in diazotrophic communities reveals novel niche zonation in the East China Sea
Source: Copernicus journal article supplement (doi:10.5194/egusphere-2025-3763), 2025-08-25
Supplement: Supplementary file [file revised_manuscript.pdf › file/revised_manuscript.pdf]

# Spatiotemporal heterogeneity in diazotrophic communities reveals novel niche zonation in the East China Sea

Guangming Mai, Han Zhang, Meng Chen, Tuo Shi

Marine Genomics and Biotechnology Program, Institute of Marine Science and Technology, Shandong University, Qingdao, Shandong, PR China

*Correspondence to:* Tuo Shi (tuoshi@sdu.edu.cn)

**Abstract.** The East China Sea (ECS) is a hotspot for studying nitrogen fixation in the marginal seas of the western Pacific, where this microbially mediated process is profoundly influenced by both the coastal and oceanic current systems. Yet, how physical forcing controls the biogeography of diazotrophs and regional nitrogen budget in the ECS remains poorly characterized. Here, we carried out a cross-season survey and demonstrated dynamics in diazotrophic communities that is tightly linked to distinct water masses in the ECS. An overall spatial heterogeneity among some of the major diazotrophic phylotypes was unveiled, with the filamentous cyanobacteria *Trichodesmium*, diatom-diazotroph symbioses (Het-1 and Het-2), the unicellular cyanobacterial diazotrophs (UCYN-B) and Haptophyta-associated nitroplasts (UCYN-A) dominating the upper 30 m of the warm, N-limited offshore water intruded by the Kuroshio and Taiwan warm current, whereas diatom-associated nitroplasts (UCYN-C and  $\gamma$ -24774A11) were abundant at both the surface and 50-m depth. The diazotrophic abundances and nitrogen fixation rates were generally higher in autumn than in spring, suggesting a seasonal variability primarily regulated by hydrographic conditions (mainly temperature and salinity) associated with water mass movement. Modeling the distribution of diazotrophs in the water masses identified three taxon-specific niches occupied by eight distinct diazotrophic phylotypes. Taken together, our analyses provide mechanistic insights into the role of dominant forms of physical forcing in driving the spatiotemporal variability in diazotrophic distribution and activity in the ECS, which is of important reference in assessing diazotrophs adaptation in a changing marine ecosystem.

## 25     **Introduction**

Nitrogen is an essential nutrient for sustaining life on Earth. Although nitrogen is abundant in the atmosphere as dinitrogen gas ( $N_2$ ), it is largely unusable in this form to most organisms on the planet. For nitrogen to be able to make biomolecules such as proteins, nucleic acids, and chlorophyll, it must first be converted into biologically available ammonia ( $NH_3$ ) through  $N_2$  fixation, a process mediated by a select group of prokaryotes termed diazotrophs (Zehr and Capone, 2020). This biologically fixed nitrogen fuels primary production and carbon export in the ocean, thus ultimately affecting global carbon and nitrogen cycles (Falkowski, 1997; Karl et al., 1997; Wang et al., 2019). While much research has been devoted to  $N_2$  fixation in the open ocean (e.g., Chen et al., 2019; Shao et al., 2023; Wen et al., 2022), accumulating evidence suggests the potential of coastal aquatic system as a significant yet underappreciated source of global N budget (Fulweiler et al., 2025; Tang et al., 2019). As the vital ecotones bridging terrestrial and marine ecosystems, coastal waters exhibit pronounced environmental gradients shaped by land-ocean interactions. These complex conditions challenge our understanding of the physicochemical processes involved in regulating the distribution and activity of marine diazotrophs (Fontela et al., 2025; Jiang et al., 2023a, b; Tang et al., 2019). Delineating the dynamics of diazotrophic biogeography in the nearshore environment is, therefore, key to modeling regional nitrogen cycle and resolving disparate accounts of fixed nitrogen budget globally (Fulweiler et al., 2025; Tang et al., 2019; Tang and Cassar, 2019; Zehr and Capone, 2020).

The East China Sea (ECS) is a temperate marginal sea in the western North Pacific with complex hydrodynamic conditions governed by the East Asian monsoon as well as the intrusion of Kuroshio, a vigorous western boundary current as it enters the ECS off the northeast Taiwan (Fig. 1) (Cui et al., 2021; Qiu and Imasato, 1990). The intruded Kuroshio is typically divided into two layers, the Kuroshio surface water (KSW, upper 120 m) and the Kuroshio subsurface water (KSSW, 120–250 m) (Chen et al., 1995). At approximately 27.5°N/122°E, the KSSW bifurcates into the offshore and nearshore Kuroshio branch currents, with the latter transporting rich nutrients into the shelf region, particularly in summer (Yang et al., 2012, 2018). Meanwhile, Taiwan warm current (TWC), a mixture of waters from the Taiwan Strait and the Kuroshio, flows northward on the ECS shelf and occasionally reaches the Changjiang Estuary (Zhou et al., 2015). It has been shown that the southwest monsoon can enhance the transport of Kuroshio and TWC during

warm seasons (Yang et al., 2018; Zhou et al., 2015), whereas the inshore ECS region is strongly influenced by the Changjiang diluted water (CDW) and the coastal water (CW), both of which are notably expanded seaward under the influence of the northeast monsoon (Yue et al., 2021). Thus, the dynamic interplay between these water masses creates steep biogeochemical gradients across the ECS shelf (Chen, 2009; Zhang et al., 2007). The upwelling of nutrient-rich KSSW, coupled with terrestrial inputs from CDW and CW, may fuel phytoplankton growth in the coastal regions (e.g., Gao et al., 2025; Sun et al., 2025). In contrast, the warm, saline, and nutrient-poor KSW and TWC establish favorable habitats for diazotroph communities and N<sub>2</sub> fixation (Jiang et al., 2018, 2019, 2023a, b). Previous studies have demonstrated that changes in hydrographic conditions can control nutrient fluxes and planktonic community shifts throughout the ECS ecosystem (Jiang et al., 2018, 2019, 2023a, b; Sun et al., 2025), however, the detailed patterns of diazotrophs distribution in the ECS in relation to different water masses remain poorly characterized.

Recent studies have elucidated Kuroshio intrusion as a key driver in transporting filamentous cyanobacterial diazotrophs, including the free-living *Trichodesmium* and diatom-associated symbionts (*Richelia* and *Calothrix*) (Jiang et al., 2018, 2019, 2023a, b), to the Changjiang Estuary during warm seasons, significantly elevating the rates of N<sub>2</sub> fixation in the Kuroshio waters expanding toward the shelf region compared to the CDW and CW (Jiang et al., 2023a, b). However, the influence of water mass-driven hydrographic processes on other globally distributed diazotrophs in the ECS, such as the unicellular cyanobacterial diazotroph (e.g., UCYN-B) and Haptophyta-associated nitroplasts (early-stage N<sub>2</sub>-fixing organelles) (Coale et al., 2024; Cornejo-Castillo et al., 2024), have not been adequately examined. Given the dominance of these diazotrophs in Kuroshio (Cheung et al., 2017, 2019; Lee Chen et al., 2014; Shiozaki et al. 2018; Wu et al., 2018) and a currently disproportionate research focus on the filamentous *Trichodesmium* populations in individual seasons (Jiang et al., 2017, 2019, 2023a, b; Yue et al., 2021), systematic investigation into the compositional dynamics of diazotrophs across the ECS is urgently needed. Furthermore, water mass movements in the ECS are seasonally modulated by the East Asian monsoon (Yin et al., 2018), and the seasonal variability in current patterns is projected to be strengthened in climate models (Vélez-Belchí et al., 2013; Yang et al., 2024), thus necessitating a comprehensive understanding of how increasingly intensified water mass movements may restructure the distribution of distinct diazotrophic phylotypes in the

ECS (Tang and Cassar, 2019).

80        Realized niche modeling provides a trait-based framework for analyzing biogeographic patterns by  
examining species fitness and their ecological responses to environmental changes (Edwards et al., 2013;  
Irwin et al., 2012; Litchman et al., 2012), which has been integrated into biogeochemical models to predict  
species distribution under future climate change scenarios (Irwin et al., 2012, 2015). The Maximum Entropy  
model has proven particularly effective for characterizing species distribution in realized niches, even from  
85    sparse field observations (Irwin et al., 2012; Phillips et al., 2006). This model is capable of identifying  
multidimensional niche spaces along key environmental gradients (e.g., temperature and nutrients) through  
regularization that maximizes environmental dependency while minimizing observational bias (Irwin et al.,  
2012; Phillips et al., 2006). A major advantage of this method is its ability to operate without absence data or  
uniform sampling effort in space or time, making it suitable for oceanographic studies that rely on  
90    opportunistic sampling (Brun et al., 2015; Irwin et al., 2012). This approach has been successfully applied  
across diverse oceanic regimes, from the western Pacific marginal seas (Xiao et al., 2018; Zhong et al., 2020)  
and the North Atlantic (Irwin et al., 2012, 2015) to the global open ocean (Brun et al., 2015), consistently  
revealing that functionally analogous phytoplankton taxa (e.g., coccolithophores) occupy more similar niches  
than taxonomically distinct groups (e.g., diatoms). Despite the progress in modeling phytoplankton ecology  
95    in general, our understanding of the realized niches of diazotrophic communities remains fragmented, with  
only limited documentation on the modeling of realized niches of *Trichodesmium* and *Richelia* in the open  
ocean (Brun et al., 2015). However, these niche traits have yet to be extended to highly variable temperate  
marginal seas, thereby constraining our ability to predict N<sub>2</sub> fixation across the global ocean under changing  
climatic conditions.

100        To illuminate the patterns and drivers of N<sub>2</sub> fixation in the ECS, we conducted a cross-season survey  
analyzing the distribution, abundance and activity of the major diazotrophic phylotypes known to date,  
alongside hydrographic analysis and integrated niche modeling approaches. Our analyses reveal  
spatiotemporal heterogeneity in diazotrophic distribution and N<sub>2</sub> fixation rate, which is highly correlated with  
distinct water masses. Overall, the realized niche partitioning presented here emphasizes the role of physical  
105    forcing (e.g., Kuroshio intrusion) in shaping the diversity and biogeography of diazotrophs in a marginal sea

with complex land-ocean interactions.

## 2 Materials and methods

### 2.1 Field sampling and environmental parameter collection

We conducted a cross-season survey at 42 stations in the ECS aboard the research vessel *Xiang Yang Hong* 18 during the 2023 autumn (October 13–30) and 2024 spring (April 9–24) (Fig. 1). At each station, temperature and salinity were acquired from a Seabird 911plus conductivity–temperature–depth sampler (Sea-Bird Electronics, USA) and binned over 1 m depth intervals. For biological and environmental sample collection, seawater was collected at 3 or 7 discrete depths throughout the upper 100 m using Niskin bottles. Approximately 2 L of seawater was prefiltered through a 200 µm pore-size nylon mesh to remove large zooplankton, followed by filtration onto a 0.2 µm pore-size PES membrane filter (Pall, USA). The membranes were flash-frozen in liquid N<sub>2</sub> for subsequent DNA extraction. Seawater samples for nutrient analyses were filtered through 0.2 µm pore-size polycarbonate membranes (Millipore, USA) and then dispensed into 100 mL acid-washed polyethylene bottles and stored at –20°C. Nitrate plus nitrite (hereafter abbreviated as NO<sub>x</sub>), soluble reactive phosphorus (SRP) and dissolved silicon (DSi) concentrations were analyzed using a Technicon AA3 AutoAnalyzer (Bran Luebbe, Germany). The N:P ratios were calculated based on the molar ratio of NO<sub>x</sub> and SRP. Seawater samples (prefiltered with 200 µm pore size mesh) for RNA analysis were collected at 7 stations (Fig. 5) in the upper 50 m using acid-rinsed Nalgene polycarbonate bottles during the day (13:00–15:30 local time) or at night (21:40–3:40 local time) to mirror diel variations in nitrogenase reductase gene (*nifH*) expression (Church et al., 2005b; Moisander et al., 2014). Each sample was taken by filtering 4.5 L of seawater onto a 0.2 µm pore-size PES membrane (Pall, USA), which was soaked in 1 mL of RNAlater (ThermoFisher, USA) and then instantly refrigerated in liquid N<sub>2</sub> for later extraction. Surface seawater was also obtained from 24 stations of the study area to measure the rates of N<sub>2</sub> fixation, with details described below. Additionally, two transects (A and B) spanning from nearshore to offshore waters were chosen to analyze vertical gradients of biological and environmental factors (Fig. 1).

## 2.2 DNA and RNA extraction

DNA was extracted using the cetyltrimethylammonium bromide method as described by Zhang et al. (2024). The concentration and purity of DNA were determined using a NanoPhotometer N50 spectrophotometer (Implen, Germany). RNA was extracted with TRI Reagent (Molecular Research Center, USA), and the extracted RNA was subjected to DNA digestion and purification using a Direct-zol RNA Miniprep kit (Zymo, USA). DNA contamination in purified RNA was checked by amplifying the bacterial 16S rRNA gene with universal primers 341F and 806R (Wasimuddin et al., 2020). The *nifH* mRNA was reversely transcribed to synthesize complementary DNA (cDNA) using a RevertAid RT kit (Thermo Fisher Scientific, USA) with the gene-specific reverse transcription (RT)-primers *nifH2* and *nifH3* (Moisander et al., 2014), following the manufacturer's protocol.

## 2.3 TaqMan qPCR assay of targeted *nifH* genes and transcripts

Recent studies have demonstrated UCYN-A2, UCYN-C and  $\gamma$ -24774A11 as nitroplasts in the haptophyte *Braarudosphaera bigelowii* (Coale et al., 2024; Cornejo-Castillo et al., 2024) and diatoms (Schvarcz et al., 2022, 2024; Tschitschko et al., 2024). In contrast, other UCYN-A sublineages such as UCYN-A1 have not yet been confirmed to possess the same defining characteristics in its association with haptophytes (Coale et al., 2024; Kantor et al., 2024). Therefore, for clarity and consistency with prior literature, we classified UCYN-A2, UCYN-C, and  $\gamma$ -24774A11 as distinct haptophyte/diatom nitroplasts, while designating UCYN-A1 as other UCYN-A sublineages. We then performed TaqMan quantitative PCR (qPCR) to quantify *nifH* gene and transcript abundances of nine diazotrophic phylotypes, including *Trichodesmium*, *Richelia* (Het-1 and Het-2), *Calothrix* (Het-3), UCYN-B as well as the N<sub>2</sub>-fixing haptophytes and diatoms mentioned above, using established primer and probe sets (Table S1) (Church et al., 2005a, b; Foster et al., 2007; Langlois et al., 2008; Moisander et al., 2008, 2010; Thompson et al., 2014). The reference *nifH* sequences used for making standard curves were synthesized at Sangon Biotech (Shanghai, China) (Table S1). Duplicate qPCR assays were run for each DNA/cDNA sample and the standards on a CFX96 real-time system (Bio-Rad Laboratories, USA). Each reaction mixture (10  $\mu$ L) contained 5  $\mu$ L of Premix Ex Taq (Takara Bio, Japan), 0.4  $\mu$ M each of the forward and reverse primers, 0.4  $\mu$ M of TaqMan probe, 2  $\mu$ L of template DNA or cDNA,

and nuclease-free water (Thermo Fisher Scientific). The thermal cycling conditions were 50°C for 2 min, 95°C for 2 min, and 45 cycles of 95°C for 15 s, followed by 60°C (64°C for UCYN-A2) for 1 min. A standard curve was generated by serial dilutions (between  $10^1$  and  $10^7$  copies per well) of a known concentration of the *nifH* references, and the negative controls were also included in each run to check contamination. The detection limit of the qPCR reactions was 10 *nifH* gene copies per reaction, corresponding to approximately 56–250 copies per liter of seawater. Considering that this qPCR assay could amplify UCYN-A2 together with relatively high abundances of UCYN-A3 and UCYN-A4 (Cheung et al., 2017, 2019; Farnelid et al., 2016), we referred to the target collectively as UCYN-A2/A3/A4.

## 2.4 Measurement of nitrogen fixation rate

Nitrogen fixation rates (NFRs) were determined using the  $^{15}\text{N}_2$  gas dissolution method (Mohr et al., 2010; Großkopf et al., 2012; Montoya et al., 1996). Briefly, 0.22  $\mu\text{m}$ -filtered seawater was degassed using a Sterapore membrane unit (20M1500A) (Mitsubishi Rayon, Japan) and then stored in a Tedlar bag without headspaces (Shiozaki et al., 2015). After that, the  $^{15}\text{N}_2$  gas stock (99%) (Cambridge Isotope Laboratories, USA) was injected into the bag at a ratio of 10 mL of  $^{15}\text{N}_2$  gas per 1 L of seawater. The bag was gently tapped until the gas was fully equilibrated. At designated stations, duplicate acid-cleaned 2.3-L polycarbonate bottles were filled with bubble-free surface seawater, each spiked with 200 mL of  $^{15}\text{N}_2$ -enriched seawater and then incubated on deck for 24 h. Incubated samples were filtered (vacuum pressure <200 mm Hg) onto pre-combusted (450°C, 4 h) GF75 membranes (Advantec, Japan), which were immediately stored in liquid  $\text{N}_2$  until onshore processing for particulate organic N (PON) and  $^{15}\text{N}$  abundance measurements. Unamended natural seawater samples were also collected for comparison as a blank control. The PON and  $^{15}\text{N}$  abundances were analyzed using an elemental analyzer interfaced with an isotope ratio mass spectrometry (Thermo Fisher Scientific). The NFR was calculated according to Montoya et al. (1996), and the minimum quantifiable NFR for each station ranged from 0.11 to 0.76  $\text{nmol N L}^{-1} \text{d}^{-1}$  (Table S2) (Gradoville et al., 2017).

## 2.5 Statistical analyses

### 2.5.1 Water mass analyses

185 To identify the hydrographic dynamics induced by distinct water masses, an optimum multiparameter analysis (OMPA) (Tomczak and Large, 1989) was applied to calculate their contribution at each sampling depth. The method quantitatively evaluates the mixing ratios of source water types (SWTs) based on quasi-conservative properties (e.g., temperature and salinity) by solving a series of linear equations. Based on previous studies (Chen, 2009; Yang et al., 2012) and the temperature-salinity diagram (Fig. S1), the ECS is  
190 primarily influenced by the CDW/CW, TWC, KSW and KSSW, and we determined the properties (temperature and salinity) of CDW/CW by the observational data from stations SF1 (31.16°N/122.56°E) and SF2 (30.49°N/122.67°E), and the properties of other SWTs (i.e., TWC, KSW and KSSW) by the modeled data from the World Ocean Atlas 2023 dataset (Table S3) (Locarnini et al., 2024; Reagan et al., 2024). The OMPA was carried out with Python package “pyompa” (Shrikumar et al., 2022). The OMPA results were  
195 validated by the model residuals, which lay within the acceptable thresholds for temperature (-0.80–0.86) and salinity (-4.51–0.07) as defined by Lawrence et al. (2022).

### 2.5.2 Significance test and correlation analysis

A Wilcoxon signed-rank test was employed to assess the significant differences ( $p < 0.05$ ) in biological and  
200 environmental variables across regions and sampling seasons because of the violation of assumptions related to normality and homogeneity of variance. Pearson correlation analysis was adopted to explore relationship among *nifH* gene and transcript abundances ( $\log_{10}$  transformation), NFRs, environmental factors (z-score scaling), and distinct water masses (centered log ratio transformation).

### 205 2.5.3 Univariate realized niche parametrization

Realized niches of diazotrophs in relation to environmental variables in the ECS were determined in a combined framework implementing the Maximum Entropy (MaxEnt) (Phillips et al., 2006) and generalized additive model (GAM), as described by Irwin et al. (2012) and Xiao et al. (2018). The MaxEnt is a widely



used species distribution model that estimates niches by combining presence-only species records with background-adjusted environmental data (Irwin et al., 2012). The quality predictive performance of MaxEnt allows it to effectively characterize species distributions even with limited data (Brun et al., 2015; Irwin et al., 2012). The GAM is another regression technique for characterizing complex species-environment relationships, which models species responses continuously along environmental gradients rather than collapsing the ecological requirements into binary presence-absence data. However, the GAM can be sensitive to numerous zero values in species abundance data, which may violate model assumptions and lead to biased response curves. To address this, an integrated MaxEnt-GAM framework was applied in this study, which estimates species presence probability and abundance before combining them through multiplication. This framework has been used to identify the realized niches of marine phytoplankton such as diatoms, haptophytes and cyanobacteria in the western Pacific marginal seas (Xiao et al., 2018; Zhong et al., 2020).

Given the complicated effects of collinearity among environmental variables on multivariate models in the MaxEnt and GAM, we assessed the response of each diazotrophic phylotype to each individual environmental driver (i.e., the univariate model). The models are formulated as follows:

$$f(x) = P(y = 1|x) \times C(x) \quad (1)$$

$$P(y = 1|x) = P(y = 1) \times g_1(x)/g(x) \quad (2)$$

$$C(x) = \alpha + s(x) + \varepsilon \quad (3)$$

where  $f(x)$  denotes the diazotroph abundance determined by a specific environment,  $x$ . The conditional probability of detecting diazotrophic phylotype in the environment,  $P(y = 1|x)$ , is evaluated using Bayes' theorem of the MaxEnt.  $P(y = 1)$  denotes the probability that diazotrophic phylotype would be found in a random sample. The probability distribution functions  $g(x)$  and  $g_1(x)$  are estimated from the environmental condition of all available background observations and from the conditions where the phylotype is present, respectively.  $C(x)$  represents the estimated abundance of the diazotrophic phylotype as derived from GAM, using the same observational data as  $g_1(x)$ , but with abundance data ( $\text{Log}_{10}$  transformation) instead of presence-only data. The term  $s(x)$  refers to a one-dimensional nonlinear function based on cubic regression splines,  $\alpha$  is the grand mean, and  $\varepsilon$  denotes the error term.

We employed MaxEnt software (version 3.4.3) for model fitting and related statistics. To minimize

model overfitting and complexity, threshold features were disabled (Irwin et al., 2012), while linear, quadratic, product and hinge features were enabled. All other parameters remained at default values. Model performance was assessed using the receiver operating characteristic (ROC) metric, which compares the true positive rate to the false positive rate across multiple probability thresholds applied to continuous probabilistic output from the MaxEnt. The area under the ROC curve (AUC) served as a summary metric, where 1 indicates perfect discrimination and 0.5 represents random prediction. For each diazotrophic phylotype, the univariate model with a mean cross-validation AUC significantly greater than 0.5 at the 95% significance level (one-sample Student's *t*-test, five replicates) were retained. Subsequently, 75% of presence records were randomly selected with replacement for model training, and the remainder were used for testing. We performed 1000 bootstrap iterations for every phylotype-environmental variable combination, recording the logistic probability for each resampled set. Preliminary sensitivity analysis confirmed that 1000 iterations yielded stable niche estimates and confidence intervals (data not shown). The GAMs with default settings were similarly applied to the same bootstrapped samples using abundance data (Log<sub>10</sub> transformation).

Following Irwin et al. (2012), we characterized the univariate response curves,  $f(x)$ , with two parameters: niche mean ( $\mu$ ) and breadth ( $\sigma$ ), calculated as:

$$\mu = \frac{\int xf(x)dx}{\int f(x)dx} \quad (4)$$

$$\sigma^2 = \frac{\int (x-\mu)^2 f(x)dx}{\int f(x)dx} \quad (5)$$

We used the  $\mu$  and  $\sigma$  of all environmental variables to define the realized niches of each diazotrophic phylotype. Here,  $\mu$  represents the central environmental condition, while  $\sigma$  indicates the phylotype's tolerance range for a given variable.

Owing to limited data for some diazotrophic phylotypes, we integrated published data (Cheung et al., 2019; Sato et al., 2025; Shiozaki et al., 2018) with our own field observations in the ECS (this study plus unpublished surface data from October–November 2022 and April–May 2023). The total number of data points utilized in the MaxEnt-GAM framework for each diazotrophic phylotype was presented in Table S4. Principal component analysis (PCA) was utilized to discern the relationships between diazotrophic phylotypes and the realized niches (z-score scaling). Ward's minimum variance clustering was conducted based on Euclidean distances calculated from standardized scores of the first two PCA components. The

optimal cluster number was determined by analyzing within-cluster sum of squared errors through an elbow plot across candidate cluster numbers.

The Wilcoxon signed-rank test and one-sample Student's *t*-test were performed with R (version 4.1.3, <http://www.r-project.org>, last access: 10 March 2025) package “stats”, Pearson correlation analysis with R package “psych” (Illinois, 2025), PCA and clustering analysis with R package “vegan” (Oksanen et al., 2024), GAM with R package “mgcv” (Wood, 2011), and pie chart with R package “scatterpie” (Yu, 2025).

### 3 Results

#### 3.1 Environmental conditions

The physicochemical parameters in the ECS showed apparent spatial variations during autumn and spring (Fig. 2). Sea surface temperature was significantly higher in autumn (23.1–27.6°C) than that in spring (14.0–25.8°C;  $p < 0.05$ ) (Fig. 2A and F), while no significant seasonal difference was detected in salinity, though autumn values had lower range (29.7–34.4 PSU) compared to spring (26.6–34.6 PSU) (Fig. 2B and G). Horizontally, the highest temperature ( $>25^{\circ}\text{C}$ ) and salinity ( $>34$  PSU) were observed on the outer ECS shelf, accompanied by high proportions ( $>80\%$ ) of KSW and TWC (Fig. S2B, C, F and G), indicating strong intrusions from these water masses. In contrast, the lowest temperature and salinity values were found mainly in the coastal regions influenced by CDW/CW ( $>60\%$  in proportion; Fig. S2A and E). Particularly in spring, the seaward extension of CDW/CW (temperature  $<18^{\circ}\text{C}$  and salinity  $<31$  PSU) was strongly enhanced under the East Asian monsoon (Fig. S2E). Vertically, the cold ( $<20^{\circ}\text{C}$ ), saline ( $>34$  PSU) waters dominated the bottom layer along the transects A and B during the sampling seasons (Fig. S3), indicating significant KSSW intrusions ( $>80\%$  in proportion) on the ECS shelf (Fig. S2D and H). Surface  $\text{NO}_x$  concentration in autumn (0.44–17.71  $\mu\text{M}$ ) was in a narrower range than that in spring (0.16–19.11  $\mu\text{M}$ ), but the values were 6–12 times higher in nearshore waters relative to offshore regions in both seasons ( $p < 0.05$ ; Fig. 2C and H). However, SRP content was found to be comparable between these regions during autumn (0.14–0.91  $\mu\text{M}$ ; Fig. 2D) and spring (0.14–0.84  $\mu\text{M}$ ; Fig. 2I), suggesting that CDW/CW and KSW may be important sources for SRP in nearshore and offshore environments, respectively. The N:P ratio exhibited a lower range in autumn (1.3–19.5) compared to spring (0.4–37.3), but exceeded the Redfield ratio (16) in coastal waters in

both seasons (autumn:  $18.2 \pm 1.2$  at stations 1, 22 and 31; spring:  $25.7 \pm 7.0$  at stations 1, 4, 12, 13, 14, 21 and 31), mirroring the spatial distribution pattern of  $\text{NO}_x$  (Fig. 2E and J).

### 3.2 Variations in the distribution of major planktonic diazotrophs

Significant spatial heterogeneity in *nifH* gene abundance between autumn and spring was observed in almost all the diazotrophic phylotypes examined except Het-3, which remained undetectable in qPCR assay (Fig. 3).

In autumn, *Trichodesmium* emerged as the dominant diazotroph, reaching up to  $6.6 \times 10^5$  copies  $\text{L}^{-1}$  at surface and  $9.2 \times 10^9$  copies  $\text{m}^{-2}$  throughout the water column (Fig. 3A and C). *Trichodesmium* accounted for approximately 90% of the *nifH* gene pool of the targeted diazotrophs in the ECS, with both the surface and depth-integrated abundances increasing along the coast-to-offshore transects. Additionally, Hets (Het-1:  $11533 \pm 11039$  copies  $\text{L}^{-1}$ ; Het-2:  $5439 \pm 7317$  copies  $\text{L}^{-1}$ ), UCYN-B ( $9107 \pm 13009$  copies  $\text{L}^{-1}$ ) and  $\gamma$ -24774A11 ( $1961 \pm 2316$  copies  $\text{L}^{-1}$ ) were found primarily in the southeastern ECS, with 1–2 orders of magnitude lower in abundance than *Trichodesmium*. The abundances of the UCYN-A (UCYN-A1 and UCYN-A2/A3/A4) were mostly below  $1.0 \times 10^3$  copies  $\text{L}^{-1}$  in the surveyed areas. In spring, the targeted diazotrophs were mostly undetectable, except at some of stations in the southeastern ECS, where *Trichodesmium* was the most abundant (up to  $6.0 \times 10^5$  copies  $\text{L}^{-1}$  at surface and  $1.1 \times 10^{10}$  copies  $\text{m}^{-2}$  throughout the water column), followed by UCYN-A1 (up to  $1.7 \times 10^5$  copies  $\text{L}^{-1}$  and  $8.4 \times 10^9$  copies  $\text{m}^{-2}$ ) (Fig. 3B and D). The abundances of the other targeted diazotrophs (Hets, UCYN-A2/A3/A4, UCYN-B, UCYN-C and  $\gamma$ -24774A11) varied between  $1.0 \times 10^3$  and  $3.0 \times 10^4$  copies  $\text{L}^{-1}$  in the ECS.

The targeted diazotrophs also exhibited seasonal variations in vertical distribution (Fig. 4 and S4). The average *nifH* gene abundances of *Trichodesmium* and Hets in the upper 50 m were considerably higher in autumn than those in spring, but this seasonal difference diminished gradually with increasing depths (Fig. 4). Remarkably, UCYN-B displayed the seasonal abundance difference continuously throughout the water column (Fig. 4). In contrast, the UCYN-A and UCYN-C in the upper 50 m were markedly less abundant in autumn than that in spring, while  $\gamma$ -24774A11 showed no depth-dependent seasonal variation (Fig. 4). Profiling along the transects A (stations 22–30) and B (stations 36–42) further revealed that *Trichodesmium* occurred more widely in autumn (recorded at 57 stations) compared to spring (20 stations), but its abundance

consistently peaked ( $>10^5$  copies  $L^{-1}$ ) in the upper 30 m during both seasons (Fig. S4A–D). The Hets were mainly found in the upper 30 m, and most abundant ( $>10^4$  copies  $L^{-1}$ ) in the southeastern ECS during spring (Fig. S4E–L). Among them, Het-2 showed a broader distribution (detected at 47 stations in autumn and 38 stations in spring) than Het-1 (12 stations per season) and peaked in the subsurface (30-m depth) (Fig. 4, S4E–L). The diatom symbionts/organelles (i.e., UCYN-C and  $\gamma$ -24774A11) were most abundant ( $>10^3$  copies  $L^{-1}$ ) at depths of 0–50 m (Fig. 4, S4U–Z), demonstrating moderately deeper distributions than Hets. UCYN-A2/A3/A4 was similar to *Trichodesmium* in vertical distribution but with lower abundances ( $\sim 10^4$  copies  $L^{-1}$ ) in spring, while UCYN-A1 and UCYN-B reached their highest abundance ( $>10^4$  copies  $L^{-1}$ ) at depths of 0–30 m (Fig. S4M–T). Overall, diazotroph abundances decreased markedly below the 50-m layer, except for UCYN-A1 and UCYN-B which exhibited a moderate decline, possibly due to low temperature caused by KSSW intrusion (Fig. S3 and S4).

### 3.3 Pattern of *nifH* transcription in the targeted diazotrophs

Transcription of the *nifH* gene in the targeted diazotrophs generally mirrored the observed gene abundance pattern but displayed greater seasonal variability across the stations (Fig. 5). In autumn, the *nifH* transcripts of *Trichodesmium* were detected as the most abundant among 6 of the 7 stations sampled, ranging from  $6.8 \times 10^3$  to  $1.7 \times 10^5$  *nifH* transcripts  $L^{-1}$  at surface and from  $5.1 \times 10^4$  to  $2.4 \times 10^6$  *nifH* transcripts  $m^{-2}$  in the upper 50 m (Fig. 5A and C). The *nifH* transcripts of Het-2 and UCYN-B were similarly high in the southeastern ECS ( $8.0 \times 10^3$  *nifH* transcripts  $L^{-1}$  at surface and  $1.7 \times 10^5$  *nifH* transcripts  $m^{-2}$  in the upper 50-m water column). The *nifH* transcripts of Het-1 and  $\gamma$ -24774A11 were 1–2 orders of magnitude lower relative to the other targeted diazotrophs. Overall, *Trichodesmium* dominated the *nifH* transcript pool ( $>70\%$ ) of the targeted diazotrophs, except at station 30 where Het-2 (40%) and UCYN-B (40%) exhibited relatively higher abundance. In spring, the *nifH* transcripts were only detected at 2 of the 7 stations sampled (Fig. 5B and D). At station 30, *Trichodesmium*, Het-1, UYN-A1 and UCYN-B equally dominated the *nifH* transcript pools of the targeted diazotrophs at surface and in the upper 50-m water column. At station 40, however, *Trichodesmium*, Het-1 and UYN-A1 transcripts were abundant at surface, whereas UCYN-B prevailed at depths of 10–50 m. Despite the station-to-station variations, some diazotrophs exhibited distinct diel

variations in *nifH* transcription (Fig. S5). The *nifH* transcription levels of *Trichodesmium*, Het-1 and UYCN-A were significantly higher at daytime (Fig. S5A, B, D and E), whereas Het-2 and UYCN-B mainly expressed the *nifH* gene at night (Fig. S5C and F). The  $\gamma$ -24774A11 displayed no detectable diel pattern in *nifH* transcription (Fig. S5G).

### 3.4 Seasonal variations in the rates of nitrogen fixation

The NFRs in surface waters exhibited distinct seasonal variations in the ECS (Fig. 6; Table S2). In autumn, the NFRs ranged from undetectable to 6.28 nmol N L<sup>-1</sup> d<sup>-1</sup> ( $1.35 \pm 1.45$  nmol N L<sup>-1</sup> d<sup>-1</sup> on average). In spring, the NFRs ranged from undetectable to 1.67 nmol N L<sup>-1</sup> d<sup>-1</sup> ( $0.74 \pm 0.42$  nmol N L<sup>-1</sup> d<sup>-1</sup> on average) and were about half of the autumn rates on average. In both seasons, the rates were higher at Kuroshio-influenced stations (e.g., 20, 30 and 42), but lower in the CDW/CW-affected regions (>60% of water mass; e.g., stations 1 and 31; Fig. S2A, C, E and G).

### 3.5 Correlation among diazotroph abundances, N<sub>2</sub> fixation rates and environmental variables in distinct water masses

In both seasons, diazotroph abundances correlated positively with temperature and salinity, and negatively with water depth, nutrient concentrations (NO<sub>x</sub>, SRP and DSi), and N:P ratio, although UYCN-B deviated from these trends in autumn (Fig. 7). Similarly, the NFRs were also positively correlated with temperature and salinity and negatively with nutrient levels (except for SPR in spring) and N:P ratio. Regarding water masses, diazotroph abundances and activity (i.e., NFR) were positively associated with KSW in both seasons and TWC in spring, but negatively associated with CDW/CW and KSSW in spring. Furthermore, the NFRs correlated positively with diazotroph abundances but negatively with their *nifH* gene transcripts across both seasons (Table S5), indicating that *nifH* transcript levels are not a reliable proxy for N<sub>2</sub> fixation. Collectively, these findings demonstrate that the distribution and activity of targeted diazotrophs were primarily constrained by KSW, with characteristic high temperature and salinity, shallow water depth, and oligotrophic conditions.

### 3.6 Model performance and diazotrophic realized niches

Prior to the MaxEnt-GAM framework, model performance for the realized niches of each diazotrophic phylotype in relation to each individual environmental factor was assessed using AUC scores from MaxEnt. The AUC values ranged from 0.61 to 0.94 across diazotrophic phylotypes and environmental variables, with an average of 0.77 (Table S4), suggesting better predictive accuracy of the univariate models than the random predictions. Notably, UCYN-C achieved the highest model performance with an average AUC of 0.87 across all the variables, likely due to the relatively small dataset ( $N = 30$ ; Table S4). In contrast, *Trichodesmium* yielded the lowest average AUC (0.66), which may be attributed to its larger sample size ( $N = 242$ ).

We characterized the realized niche mean ( $\mu$ ) and breadth ( $\sigma$ ) of diazotrophs in the ECS with combined hydrographic, environmental and biological data, identifying three distinct clusters among the diazotrophs (Fig. 8 and S6). *Trichodesmium* exhibited low, broad temperature and salinity niches ( $\mu_{\text{Temperature}} = 23.5^{\circ}\text{C}$ ,  $\sigma_{\text{Temperature}} = 3.5^{\circ}\text{C}$ ,  $\mu_{\text{Salinity}} = 33.2$  PSU and  $\sigma_{\text{Salinity}} = 1.2$  PSU) as well as high nutrient niches ( $\mu_{\text{NO}_x} = 6.93$   $\mu\text{M}$ ,  $\mu_{\text{SRP}} = 0.61$   $\mu\text{M}$ ,  $\mu_{\text{DSi}} = 11.12$   $\mu\text{M}$  and  $\mu_{\text{N:P}} = 7.64$ ). UCYN-A1, UCYN-A2/A3/A4 and UCYN-B generally cohabited in high-salinity (34.3 PSU on average) and moderate-temperature ( $24.1^{\circ}\text{C}$  on average) environments. UCYN-B, however, was slightly separated from UCYN-A due to its relatively high nutrient niches ( $\mu_{\text{NO}_x} = 2.91$   $\mu\text{M}$  and  $\mu_{\text{SRP}} = 0.48$   $\mu\text{M}$ ; Fig. 8G). The diatom-diazotroph symbioses (i.e., Hets, UCYN-C and  $\gamma$ -24774A11) were associated with high-temperature ( $25.7^{\circ}\text{C}$  on average), low- $\text{NO}_x$  (0.98  $\mu\text{M}$  on average) and moderate-SRP conditions (0.39  $\mu\text{M}$  on average), demonstrating substantial ecological overlap among them.

## 4 Discussion

### 4.1 Spatial distribution of key planktonic diazotrophs in the ECS

Temperature and nutrient availability are widely recognized as key environmental factors governing the biogeographical distribution and physiological constraints of filamentous diazotrophs (Chen et al., 2019; Tang and Cassar, 2019; Tuo et al., 2021). As expected, our quantification of the *nifH* gene copies showed that *Trichodesmium* and Hets were more abundant on the warm,  $\text{NO}_x$ -limited outer ECS shelf (Fig. 3) frequently intruded by the Kuroshio and TWC (Fig. S2B, C, F and G). In contrast, their abundances were considerably

lower in the cold, NO<sub>x</sub>-rich coastal waters influenced by the CDW/CW (Fig. S2A and E), showing positive correlation with temperatures but negative correlation with nutrient concentrations and N:P ratios (Fig. 7). The distribution of *Trichodesmium* and Hets in the CDW/CW of the ECS has been demonstrated via microscopic observations in previous studies (Jiang et al., 2018, 2019, 2023a, b), however, this pattern is different from the observations of filamentous diazotrophs that are abundant (10<sup>4</sup>–10<sup>6</sup> copies L<sup>-1</sup>) in the Amazon (Foster et al., 2007) and Mekong River plumes (Bombar et al., 2011), where the concentration of NO<sub>x</sub> is low but that of SRP, DSi and iron is high. The ratios of N:P (autumn: 18.2; spring: 25.7) and NO<sub>x</sub>:DSi (0.8 in both seasons) in the CDW of the ECS are much higher than those in the Amazon (N:P: 1.3; NO<sub>x</sub>:DSi: 0.01) (Foster et al., 2007) and Mekong river plumes (N:P: 3.7; NO<sub>x</sub>:DSi: 0.1) (Nguyen-Ngoc et al., 2023), implying that nutrient stoichiometry plays a key role in structuring diazotroph communities in these regimes (Gomes et al., 2018). Notably, while our modeling result indicated *Trichodesmium* can survive in relatively cool (23.5°C), NO<sub>x</sub>-rich environments (6.93 μM; Fig. 8), it was detected the most abundant in the warm, NO<sub>x</sub>-depleted outer ECS shelf (Fig. 3), a pattern that is consistent with the basal physiology of *Trichodesmium* (Brun et al., 2015; Jiang et al., 2025; Tang and Cassar, 2019).

Additionally, non-filamentous diazotrophs (UCYN-A, UCYN-B, UCYN-C and γ-24774A11) were abundant (>5×10<sup>4</sup> *nifH* gene copies L<sup>-1</sup>) in Kuroshio-influenced waters, but not detectable in the CDW/CW-dominated regions (Fig. 3 and S2). Highly abundant UCYN-A1, UCYN-B and γ-24774A11 (>10<sup>4</sup> *nifH* gene copies L<sup>-1</sup>) were consistently found in Kuroshio, particularly in its upstream region (Chen et al., 2019; Wen et al., 2022) and surface waters spanning from northeastern Taiwan to south coast of mainland Japan (Cheung et al., 2019; Shiozaki et al., 2018). It is, therefore, reasonable to attribute the prevalence of these diazotrophs on the outer ECS shelf to the lateral transport by Kuroshio mainstream, as proved by the positive correlation between their abundance and Kuroshio intrusion (Fig. 7). Overall, filamentous diazotrophs were the primary N<sub>2</sub> fixers in the ECS (Jiang et al., 2023a, b), as illustrated by the prevalence of their *nifH* gene (~84% of all the *nifH* copies detected; Fig. 3) that was positively correlated with NFRs (Fig. 7) across most of the surveyed areas. On the other hand, UCYN-A1, UCYN-B and γ-24774A11 were only occasionally found in the Kuroshio-influenced regions (Fig. 3 and S2), and the correlation of their *nifH* gene abundances with NFRs (Fig. 7) suggests their potential contribution to regional N<sub>2</sub> fixation (Lee Chen et al., 2014; Wu et al., 2018).



It should be noted that the abundance of colonial diazotrophs like *Trichodesmium* and Hets may be potentially underestimated due to the use of <200- $\mu$ m size fraction in our study (e.g., Jiang et al., 2023a).

Despite a gradual decrease in abundance with increasing depths, the diazotrophs exhibited taxon-specific vertical distributions in the ECS (Fig. 4 and S4). Specifically, *Trichodesmium* showed maximum abundance in the upper 30 m (Fig. S4A–D), consistent with earlier reports of surface or subsurface maxima (10–30 m) in the ECS (Jiang et al., 2018, 2019) and other regions (Carpenter et al., 2004; Lee Chen et al., 2003; Lu et al., 2019). This depth distribution may be attributed to favorable nutrient conditions (e.g., SRP and iron) and light intensity (Turk-Kubo et al., 2018; Wen et al., 2022), which support *Trichodesmium* growth on the site of the ongoing surveys (Fig. 2D and I). Additionally, the absence of anticyclonic eddies during our surveys is likely to eliminate the downward entrainment of *Trichodesmium* in deeper water column (e.g., 50–60 m) (Fig. S7) (Jiang et al., 2018). The filamentous diazotrophs Het-1 and Het-2 showed distinct maximum depths (surface versus 30 m; Fig. 4), contrasting with previously documented subsurface maxima (10–40 m) for both phylotypes in the ECS (Jiang et al., 2019), the tropical North Atlantic (Foster et al., 2007; Goebel et al., 2010) and the western tropical South Pacific (Stenegren et al., 2018). This may be due to different habitat preferences between the Het hosts, as the Het-1 host was found mainly under  $\text{NO}_x$ -depleted conditions but not in the deeper,  $\text{NO}_x$ -repleted water column (Tuo et al., 2014). Alternatively, the differences in thermal sensitivity between Het-1 and Het-2 may explain their vertical distribution, as Het-1 lives within a relatively narrower temperature range (20.4–27.5°C) than Het-2 (17.6–27.6°C; Fig. S3). In contrast, the other two diatom-diazotroph symbioses (UCYN-C and  $\gamma$ -24774A11) showed both surface and subsurface maxima (~50 m; Fig. 4). The deep distributions may result from the low light tolerance of their diatom hosts, as both symbionts lack photosynthetic pigments and rely entirely on carbon fixed by their hosts (Schvarcz et al., 2022, 2024; Tschitschko et al., 2024). Similar subsurface distributions have been observed in UCYN-C at Station ALOHA (Schvarcz et al., 2022) and  $\gamma$ -24774A11 in the northern South China Sea (SCS; Chen et al., 2019; Lu et al., 2019; Shao and Luo, 2022).

Similar to the filamentous diazotrophs, UCYN-A and UCYN-B were mostly confined to the upper 30 m, matching observations from the northern SCS (Lu et al., 2019) and global oceans (Tang and Cassar, 2019). However, UCYN-A1 and UCYN-B were moderately abundant ( $\sim 10^3$  copies  $\text{L}^{-1}$ ) in deep layers (Fig. S4M,

N, Q–T), potentially due to their low light saturation coefficients (Garcia et al., 2013; Gradoville et al., 2021; Shen et al., 2024). Moreover, the KSSW intrusion-induced low temperature (~20.5°C) at depths of 30–100 m may also favor the prevalence of UCYN-A1 (Fig. S3 and S4), the optimal growth temperature of which (~22–24°C) (Jiang et al., 2025; Moisander et al., 2010; Tang and Cassar, 2019) is moderately lower than that of the filamentous groups (~26°C for *Trichodesmium* and Hets) (Breitbarth et al., 2007; Fu et al., 2014; Tang and Cassar, 2019). However, such low temperatures may inhibit UCYN-B, which has an optimal growth temperature around 25–30°C (Fu et al., 2014; Jiang et al., 2025; Tang and Cassar, 2019; Webb et al., 2009). Nevertheless, studies have indicated that UCYN-B can persist in cold environments, albeit at low abundances (Jiang et al., 2025; Tang and Cassar, 2019). Low-temperature tolerance of UCYN-B has also been demonstrated in the laboratory (Deng et al. 2022), however, the lowest threshold temperature used for the bottle incubation (25°C) is substantially higher than the in situ temperatures (~10–30°C) in the field (Tang and Cassar, 2019). Therefore, the distribution of UCYN-B under such low-temperature conditions warrants further investigation.

#### 4.2 Seasonal variations in diazotrophic distribution and nitrogen fixation rates in the ECS

In addition to the spatial heterogeneity, our results also revealed pronounced seasonal dynamics in diazotrophic distribution in the ECS (Figs. 3 and S4), primarily driven by the synergistic interplay between monsoonal hydrographic forcing and diazotrophic taxon-specific characteristics. In autumn, the southwest monsoon intensified the northward and shoreward penetration of Kuroshio and TWC onto the ECS shelf (>80%; Fig. S2B and C), establishing warm (>24°C), NO<sub>x</sub>-deplete (<1 µM) water mass (Fig. 2 and S2) that favored the proliferation of *Trichodesmium* (Fig. 3A and C), while increasing the coastal shoaling of CDW/CW. It has been suggested that iron deficiency limits *Trichodesmium* growth (Berman-Frank et al., 2001). Given that SRP (0.2–0.4 µM) did not appear to be a limiting factor (Fig. 2D), the dominance of *Trichodesmium* in the ECS is likely due to the high level of dissolved iron (0.76–30 nM) transported via the Kuroshio and TWC (Shiozaki et al., 2015; Su et al., 2015) or delivered via aerial dust deposition (Guo et al., 2014). This pattern is consistent with the extensive observations in Kuroshio-affected, island-adjacent waters where low NO<sub>x</sub> but sufficient SRP and iron collectively support *Trichodesmium* growth (Lee Chen et al.,

2003; Shiozaki et al., 2015). In spring, however, the northeast monsoon facilitated the offshore expansion of the CDW/CW, resulting in decreased *Trichodesmium* abundance in the cold (<20°C), NO<sub>x</sub>-replete (>1 μM) northern ECS, but increased abundance in the warm, NO<sub>x</sub>-deplete southern ECS (Fig. 3B and D). In addition to *Trichodesmium*, UCYN-A and UCYN-C were 4–5 orders of magnitude more abundant in spring than in autumn, but the seasonal variation was not significant for UCYN-B (Fig. 3 and S4M–V). The distribution of UCYN-A and UCYN-C was positively correlated to higher salinity in spring (>34.5 PSU; Fig. 7B and S3), a pattern also observed in previous studies (Li et al., 2021; Shiozaki et al., 2018), but the underlying mechanism is unknown.

Our data also showed seasonal dynamics in N<sub>2</sub> fixation in the ECS, with higher NFRs in autumn relative to spring, particularly in Kuroshio-affected waters dominated by filamentous diazotrophs (i.e., stations 5, 20 and 30; Fig. 3, 6 and 7). The averaged autumn NFR (1.35 nmol N L<sup>-1</sup> d<sup>-1</sup>) was close to what has been reported during summer in the ECS (1.54 nmol N L<sup>-1</sup> d<sup>-1</sup>) (Jiang et al., 2023a), despite the differences in NFR measurement between the two studies (i.e., dissolution versus bubble methods). The decreased NFRs in spring may be related to a substantial decrease in abundance and activity of filamentous diazotrophs (Fig. 3A, B and 7), which has been suggested to account for approximately 60% of the bulk NFRs on the outer ECS shelf (Jiang et al., 2023a, b). On the other hand, the low temperature (14–20°C) in spring could otherwise promote the prevalence of non-cyanobacterial diazotrophs (NCDs) and their contribution to N<sub>2</sub> fixation, particularly in CDW/CW-affected waters (Jiang et al., 2023b), but this pattern was not comprehensively analyzed in this study since only one phylotype of NCD (γ-24774A11) was quantified with qPCR (Fig. 3 and 6). Notably, the seasonal dynamics of NFRs showed negative, but not significant, correlation with transcriptional abundances of diazotrophs (Fig. 5 and 6; Table S5), suggesting that the expression of *nifH* gene in diazotrophs may not be synchronized with actual nitrogenase activity (Turk-Kubo et al., 2012).

To assess the contribution of key diazotrophs to the N budget, we extrapolated water-column NFRs using published, cell-specific rates for the targeted diazotrophs (Table S6). We based our depth-integrated assessment on two assumptions: 1) cell-specific NFRs were considered constant throughout the water column, neglecting the regulation by environmental variables such as light, temperature and nutrient availability (e.g., Lu et al., 2018; Jiang et al., 2023a, b); 2) *nifH*-specific NFRs were derived from cell-specific rates using

average polyploidy factors, despite the environmentally and/or phylogenetically driven variations in the cellular *nifH* gene copies (Gradoville et al., 2022; Sargent et al., 2016; Shao et al., 2023). Under these assumptions, the estimated and measured surface NFRs were highly correlated (Slope = 1.04,  $R^2 = 0.39$ ,  $p < 0.001$ ; Fig. S8). Despite the uncertainties and low level of explained variance (Fig. S8), the significantly positive correlation between the two approaches support the validity of using cell-specific NFRs in assessing regional N budget. Given the depth-integrated diazotroph abundances, the averaged NFRs in the ECS ranged from 29.51  $\mu\text{mol N m}^{-2} \text{d}^{-1}$  in spring to 44.14  $\mu\text{mol N m}^{-2} \text{d}^{-1}$  in autumn (Table S6). The marked seasonal disparity may result from the below-detection abundances of filamentous diazotrophs at most of stations surveyed in spring (Fig. 3). Notably, the estimated NFRs in KSW-affected waters were considerably higher in spring (station 30, 41 and 42 averaged at 344  $\mu\text{mol N m}^{-2} \text{d}^{-1}$ ) than in autumn (station 18, 20, 28, 30, 40 and 41 averaged at 110  $\mu\text{mol N m}^{-2} \text{d}^{-1}$ ), yet both values fell within previously reported ranges in the southeastern ECS (100–428  $\mu\text{mol N m}^{-2} \text{d}^{-1}$ ) (Jiang et al., 2023a; Sato et al., 2025; Zhang et al., 2012). In terms of community composition, filamentous diazotrophs contributed 75% and 37% of the bulk NFRs in autumn and spring, respectively (Table S6), aligned with earlier observations (contribution: 26–80%) in the ECS (Jiang et al., 2023b), the northern SCS and upstream Kuroshio (Lee Chen et al., 2014), and the western Pacific (Bonnet et al., 2009; Kitajima et al., 2009). However, caution is warranted in interpreting these contributions, as the spring value (63%) for non-filamentous diazotrophs may be overestimated due to the low cellular *nifH* gene copy number used for  $\gamma$ -24774A11. Compounding this issue, the lack of cell-specific data for other NCDs means their full ecological role, particularly in cold environments where they sustain active  $\text{N}_2$  fixation (Fig. 2 and 6) (Lin et al., 2013), is likely underrepresented. To elucidate the distinction between filamentous and non-filamentous diazotrophs in their contributions to  $\text{N}_2$  fixation in the ECS, highly-resolved NFR measurements completely spanning the four seasons and across fine scales of size-fractionated sampling should be emphasized in future studies (Jiang et al., 2023b).

#### 4.3 Spatiotemporal dynamics in diazotrophic distribution reveals niche zonation

Our analysis revealed taxon-specific diazotrophic distribution that is closely linked to adjacent water masses (Fig. 7), identifying three distinct clusters among them in the multidimensional niche space of the ECS (Fig.

8 and S6). Notably, several diazotrophic phylotypes were not restricted to narrow environmental windows but occurred across a broad spectrum of temperature and nutrient conditions. For instance, while *Trichodesmium* typically dominated in high-temperature, NO<sub>x</sub>-deficient waters (e.g., Jiang et al., 2025; Nguyen et al., 2025; Tang and Cassar, 2019), it also occupied niches that encompassed relatively cool temperatures ( $\mu_{\text{temperature}} = 23.5^{\circ}\text{C}$ ,  $\sigma_{\text{temperature}} = 3.5^{\circ}\text{C}$ ) and elevated NO<sub>x</sub> levels ( $\mu_{\text{NO}_x} = 6.93 \mu\text{M}$ ,  $\sigma_{\text{NO}_x} = 5.11$  535  $\mu\text{M}$ ). This finding aligned with earlier studies reporting that *Trichodesmium* can survive, albeit at lower abundances, at temperature around 20°C (Breitbart et al., 2007; Rivero-Calle et al., 2016) and/or at NO<sub>x</sub> levels of 10–20  $\mu\text{M}$ , provided that SRP is sufficient to sustain growth (Knapp et al., 2012; Knapp, 2012). However, the realized niches here were slightly cooler in temperature ( $\mu_{\text{temperature}} = 24.2^{\circ}\text{C}$ ,  $\sigma_{\text{temperature}} = 3.2^{\circ}\text{C}$ ) but substantially higher and broader in NO<sub>x</sub> ( $\mu_{\text{NO}_x} = 2.5 \mu\text{M}$ ,  $\sigma_{\text{NO}_x} = 2.54 \mu\text{M}$ ) relative to those of the open 540 ocean (Brun et al., 2015). The expanded NO<sub>x</sub> niche breadth of *Trichodesmium* in the ECS appears to arise from intra- and/or inter-specific physiological variations. Specifically, intra-specific plasticity may enable endemic *Trichodesmium* populations to modulate N<sub>2</sub> fixation and growth by exploiting ambient SRP under fluctuating NO<sub>x</sub> regimes (Knapp et al., 2012; Knapp, 2012), or utilizing NO<sub>x</sub> directly (Boatman et al., 2018). Meanwhile, inter-specific distributions of *Trichodesmium* were evident, with *T. erythraeum* dominating 545 coastal waters whereas *T. thiebautii* prevailing on the ECS shelf (Jiang et al., 2018; Zhang et al., 2019), possibly owing to species-specific physiological optima and NO<sub>x</sub> tolerance thresholds (Carpenter et al., 1993; Confesor et al., 2022; Rodier and Le Borgne, 2008, 2010). These adaptive strategies collectively explain the broad niche underpinning the widespread distribution of *Trichodesmium* in the ECS (Fig. 3).

Our analysis showed that both UCYN-A1 and UCYN-A2/A3/A4 favored high-salinity (>34 PSU) and 550 moderate-temperature niche (~24°C), consistent with previous findings (Jiang et al., 2025; Tang and Cassar, 2019). It has been suggested that UCYN-A1 is an open-ocean ecotype and UCYN-A2 a coastal ecotype (Henke et al., 2018; Turk-Kubo et al., 2017, 2021). However, we found a co-occurrence pattern between these two ecotypes, with UCYN-A2/A3/A4 exhibiting lower abundance and narrower vertical distribution range (Fig. 3 and S4M–P) (Cabello et al., 2016; Gérikas Ribeiro et al., 2018; Wen et al., 2022). The distinct UCYN- 555 A2 distributions between this and previous studies may be due to the phenotypical plasticity of the UCYN-A2-haptophyte symbioses, allowing them to inhabit either in the oligotrophic open oceans with small cell

appearance (4–5  $\mu\text{m}$ ) or large one (7–10  $\mu\text{m}$ ) in the eutrophic coastal regions (Cabello et al., 2016; Hagino et al., 2013). Although genes related to  $\text{N}_2$  fixation and energy production are actively transcribed in both UCYN-A ecotypes, the mechanisms underlying their niche overlap and differentiation require further studies (Muñoz-Marín et al., 2023; Nguyen et al., 2025).

Although clustered together in niche space (Fig. 8G), UCYN-B differed slightly from UCYN-A by occupying relatively nutritious niches (Fig. 8C and D), allowing it to inhabit both the warm, saline, oligotrophic KSW, and the cool, equally saline but eutrophic KSSW (Fig. S4Q–T). The latter seems in contrast to the well-known preference of UCYN-B for warm, oligotrophic waters (Jiang et al., 2025; Webb et al., 2009). Nevertheless, global metadata analysis suggests that UCYN-B may survive under low temperatures (20–23°C) and high  $\text{NO}_x$  (up to 20  $\mu\text{M}$ ) and SRP levels (1–2  $\mu\text{M}$ ) (Tang and Cassar, 2019). Both field and laboratory studies have shown that UCYN-B remains viable under nitrate-rich conditions (5–20  $\mu\text{M}$ ) when SRP is sufficient (Knapp et al., 2012; Knapp, 2012; Turk-Kubo et al., 2018). These results indicate that UCYN-B has the capacity to cope with lower temperatures and elevated nutrient concentrations. Moreover, there was a clear niche differentiation between UCYN-B and *Trichodesmium* (Fig. 8), which has been reported in the northern SCS (Zhang et al., 2024) and the western Pacific (Chen et al., 2019), but this niche differentiation was not observed in the south Pacific (Tang and Cassar, 2019).

The third cluster comprised diatom-diazotroph symbioses (Het-1, Het-2, UCYN-C and  $\gamma$ -24774A11), which preferred high-temperature, low- $\text{NO}_x$  and moderate-SRP environments (Fig. 8), causing their distribution confined to KSW enriched with terrestrial and/or aerosol-derived SRP (Fig. 2D, I and 3). Such environments have been shown to enhance symbiotic associations between Hets and diatom hosts (Tuo et al., 2014) and to promote UCYN-C growth (Turk-Kubo et al., 2015) in tropical oceans. Accordingly, a significant positive correlation in distribution and abundance between Het-1 and UCYN-C has been documented in the western Pacific (Chen et al., 2019). Compared with the niche conditions suitable for open-ocean populations (temperature: 24.2°C;  $\text{NO}_x$ : 1.38  $\mu\text{M}$ ) (Brun et al., 2015), Hets inhabited niches of slightly higher temperature but lower  $\text{NO}_x$  levels (Fig. 8A and C). This result is different from previous findings based on studies analyzing all the *Richelia* diatom hosts, including *Rhizosolenia clevei* (Het-1 host), *Hemiaulus hauckii* (Het-2 host) and *H. membranaceus* (Brun et al., 2015; Luo et al., 2012), which may have distinct temperature and

nutrient optima (Stenegren et al., 2017; Tuo et al., 2014, 2021). In fact, the different niche preferences for temperature and SRP between Het-1 and Het-2 were verified in this study (Fig. 8A and D), as well as in other studies (Foster et al., 2007; Tuo et al., 2021; Stenegren et al., 2017). Furthermore, the modeled realized niche space based on regional environmental gradients (e.g., temperature: 17.6–27.6°C) may be narrower than that derived from global datasets (16.5–31.6°C) (Brun et al., 2015; Jiang et al., 2025; Tang and Cassar, 2019). Thus, the prediction of realized niche of Hets may be affected by a variety of factors, including physiological traits of the diazotrophs, their hosts, and the scale of spatial sampling. Finally, our niche modeling result suggests a cosmopolitan distribution of  $\gamma$ -24774A11 in oligotrophic surface waters (Fig. 8) (Cheung et al., 2020; Shiozaki et al., 2018; Tschitschko et al., 2024), despite the fact that it is frequently found in environments with elevated NO<sub>x</sub> concentrations (Bird and Wyman, 2013; Shao and Luo, 2022; Shiozaki et al., 2014). This feature may be related to its diatom host, which acquires a substantial fraction of fixed nitrogen from  $\gamma$ -24774A11 (Tschitschko et al., 2024). Nevertheless, in high-NO<sub>x</sub> environments, the host might leverage ambient NO<sub>x</sub> for growth, thereby partially reducing its metabolic dependency on the symbiont. To illuminate the mechanisms governing the biogeographic distribution of the  $\gamma$ -24774A11-diatom association (Cornejo-Castillo and Zehr, 2021; Shao and Luo, 2022; Tschitschko et al., 2024), more systematic studies are needed.

## **Data availability**

All data needed to evaluate the conclusions in the paper are present in Figs. 1–8 and/or the Supplement. Additional data associated with the paper are available from the corresponding authors upon request.

## **Author contributions**

TS conceived and designed the study. GM participated in the expedition cruises and collected the samples. GM, HZ, and MC contributed to the reagents, materials, and analysis tools. GM and MC analyzed the data. GM, HZ, MC, and TS drafted the manuscript. All authors read and approved the final version of the manuscript.

### Competing interests

610 The authors declare that they have no conflict of interest.

### Acknowledgements

The authors are grateful to the captain and crew of the R/V *Xiang Yang Hong 18* for logistics at sea and help with collection of the hydrographic data during the open research cruises (NORC2023-02+NORC2023-301 and NORC2024-02). We extend our special thanks to Xianyao Zhang and Yidong Xue for assistance with  
615 sampling, Mengjiao Shi, Xiaosong Zhong and Xiangbin Ran for providing the nutrient and chlorophyll *a* data, and Wupeng Xiao for discussion with data analysis. The authors also thank the reviewers for their insightful comments that helped improve the clarity of the manuscript.

### Financial support

This research has been supported by the National Natural Science Foundation of China (grant numbers  
620 41676092, 42076152, 32401350) and the Natural Science Foundation of Shandong Province of China (grant number ZR2023QD124). The work aligns with the mission of global ocean negative carbon emission program (<https://www.global-once.org>).

### References

- Berman-Frank, I., Cullen, J. T., Shaked, Y., Sherrell, R. M., and Falkowski, P. G.: Iron availability, cellular  
625 iron quotas, and nitrogen fixation in *Trichodesmium*, *Limnol. Oceanogr.*, 46, 1249–1260, <https://doi.org/10.4319/lo.2001.46.6.1249>, 2001.
- Bird, C., and Wyman, M.: Transcriptionally active heterotrophic diazotrophs are widespread in the upper water column of the Arabian Sea, *FEMS Microbiol. Ecol.*, 84, 189–200, <https://doi.org/10.1111/1574-6941.12049>, 2013.
- 630 Boatman, T. G., Davey, P. A., Lawson, T., and Geider, R. J.: The physiological cost of diazotrophy for *Trichodesmium erythraeum* IMS101, *PLoS One*, 13, e0195638, <https://doi.org/10.1371/journal.pone.0195638>, 2018.



- Bombar, D., Moisander, P., Dippner, J., Foster, R., Voss, M., Karfeld, B., and Zehr, J.: Distribution of diazotrophic microorganisms and nifH gene expression in the Mekong River plume during intermonsoon, *Mar. Ecol. Prog. Ser.*, 424, 39–52, <https://doi.org/10.3354/meps08976>, 2011.
- 635 Bonnet, S., Biegala, I. C., Dutrieux, P., Slemons, L. O., and Capone, D. G.: Nitrogen fixation in the western equatorial Pacific: Rates, diazotrophic cyanobacterial size class distribution, and biogeochemical significance, *Glob. Biogeochem. Cycles*, 23, 2008GB003439, <https://doi.org/10.1029/2008GB003439>, 2009.
- 640 Breitbarth, E., Oschlies, A., and LaRoche, J.: Physiological constraints on the global distribution of *Trichodesmium* – effect of temperature on diazotrophy, *Biogeosciences*, 4, 53–61, <https://doi.org/10.5194/bgd-3-779-2006>, 2007.
- Brun, P., Vogt, M., Payne, M. R., Gruber, N., O’Brien, C. J., Buitenhuis, E. T., Le Quéré, C., Leblanc, K., and Luo, Y.: Ecological niches of open ocean phytoplankton taxa, *Limnol. Oceanogr.*, 60, 1020–1038, <https://doi.org/10.1002/lno.10074>, 2015.
- 645 Cabello, A. M., Cornejo-Castillo, F. M., Raho, N., Blasco, D., Vidal, M., Audic, S., De Vargas, C., Latasa, M., Acinas, S. G., and Massana, R.: Global distribution and vertical patterns of a prymnesiophyte–cyanobacteria obligate symbiosis, *ISME J.*, 10, 693–706, <https://doi.org/10.1038/ismej.2015.147>, 2016.
- Carpenter, E., O’Neil, J., Dawson, R., Siddiqui, P., Roenneberg, T., and Bergman, B.: The tropical diazotrophic phytoplankter *Trichodesmium*: biological characteristics of two common species, *Mar. Ecol. Prog. Ser.*, 95, 295–304, <https://doi.org/10.3354/meps095295>, 1993.
- 650 Carpenter, E. J., Subramaniam, A., and Capone, D. G.: Biomass and primary productivity of the cyanobacterium *Trichodesmium* spp. in the tropical N Atlantic ocean, *Deep-Sea Res. Pt. I*, 51, 173–203, <https://doi.org/10.1016/j.dsr.2003.10.006>, 2004.
- 655 Chen, C. T. A., Ruo, R., Paid, S. C., Liu, C. T., and Wong, G. T. F.: Exchange of water masses between the East China Sea and the Kuroshio off northeastern Taiwan, *Cont. Shelf Res.*, 15, 19–39, [https://doi.org/10.1016/0278-4343\(93\)E0001-O](https://doi.org/10.1016/0278-4343(93)E0001-O), 1995.
- Chen, C.-T. A.: Chemical and physical fronts in the Bohai, Yellow and East China seas, *J. Mar. Syst.*, 78, 394–410, <https://doi.org/10.1016/j.jmarsys.2008.11.016>, 2009.

- 660 Chen, M., Lu, Y., Jiao, N., Tian, J., Kao, S., and Zhang, Y.: Biogeographic drivers of diazotrophs in the western Pacific Ocean, *Limnol. Oceanogr.*, 64, 1403–1421, <https://doi.org/10.1002/lno.11123>, 2019.
- Cheung, S., Suzuki, K., Saito, H., Umezawa, Y., Xia, X., and Liu, H.: Highly heterogeneous diazotroph communities in the Kuroshio current and the Tokara Strait, Japan, *PLoS One*, 12, e0186875, <https://doi.org/10.1371/journal.pone.0186875>, 2017.
- 665 Cheung, S., Suzuki, K., Xia, X., and Liu, H.: Transportation of diazotroph community from the upstream to downstream of the Kuroshio, *J. Geophys. Res.-Biogeo.*, 124, 2680–2693, <https://doi.org/10.1029/2018JG004960>, 2019.
- Cheung, S., Nitani, R., Tsurumoto, C., Endo, H., Nakaoka, S., Cheah, W., Lorda, J. F., Xia, X., Liu, H., and Suzuki, K.: Physical forcing controls the basin-scale occurrence of nitrogen-fixing organisms in the North Pacific Ocean, *Glob. Biogeochem. Cycles*, 34, e2019GB006452, <https://doi.org/10.1029/2019GB006452>, 2020.
- 670 Church, M., Jenkins, B., Karl, D., and Zehr, J.: Vertical distributions of nitrogen-fixing phylotypes at Stn ALOHA in the oligotrophic North Pacific Ocean, *Aquat. Microb. Ecol.*, 38, 3–14, <https://doi.org/10.3354/ame038003>, 2005a.
- 675 Church, M. J., Short, C. M., Jenkins, B. D., Karl, D. M., and Zehr, J. P.: Temporal patterns of nitrogenase gene (*nifH*) expression in the oligotrophic North Pacific Ocean, *Appl. Environ. Microbiol.*, 71, 5362–5370, <https://doi.org/10.1128/AEM.71.9.5362-5370.2005>, 2005b.
- Coale, T. H., Loconte, V., Turk-Kubo, K. A., Vanslebrouck, B., Mak, W. K. E., Cheung, S., Ekman, A., Chen, J.-H., Hagino, K., Takano, Y., Nishimura, T., Adachi, M., Le Gros, M., Larabell, C., and Zehr, J. P.: Nitrogen-fixing organelle in a marine alga, *Science*, 384, 217–222, <https://doi.org/10.1126/science.adk1075>, 2024.
- 680 Confesor, K. A., Selden, C. R., Powell, K. E., Donahue, L. A., Mellett, T., Caprara, S., Knapp, A. N., Buck, K. N., and Chappell, P. D.: Defining the realized niche of the two major clades of *Trichodesmium*: A study on the West Florida Shelf, *Front. Mar. Sci.*, 9, 821655, <https://doi.org/10.3389/fmars.2022.821655>, 2022.
- 685 Cornejo-Castillo, F. M. and Zehr, J. P.: Intriguing size distribution of the uncultured and globally widespread

marine non-cyanobacterial diazotroph Gamma-A, ISME J., 15, 124–128,  
<https://doi.org/10.1038/s41396-020-00765-1>, 2021.

Cornejo-Castillo, F. M., Inomura, K., Zehr, J. P., and Follows, M. J.: Metabolic trade-offs constrain the cell  
size ratio in a nitrogen-fixing symbiosis, Cell, S009286742400182X,  
<https://doi.org/10.1016/j.cell.2024.02.016>, 2024.

Cui, X., Yang, D., Sun, C., Feng, X., Gao, G., Xu, L., and Yin, B.: New insight into the onshore intrusion of  
the Kuroshio into the East China Sea, J. Geophys. Res.-Oceans, 126, e2020JC016248,  
<https://doi.org/10.1029/2020JC016248>, 2021.

Deng, L., Cheung, S., Kang, C., Liu, K., Xia, X., and Liu, H.: Elevated temperature relieves phosphorus  
limitation of marine unicellular diazotrophic cyanobacteria, Limnol. Oceanogr., 67, 122–134,  
<https://doi.org/10.1002/lno.11980>, 2022.

Edwards, K. F., Litchman, E., and Klausmeier, C. A.: Functional traits explain phytoplankton community  
structure and seasonal dynamics in a marine ecosystem, Ecol. Lett., 16, 56–63,  
<https://doi.org/10.1111/ele.12012>, 2013.

Falkowski, P. G.: Evolution of the nitrogen cycle and its influence on the biological sequestration of CO<sub>2</sub> in  
the ocean, Nature, 387, 272–275, <https://doi.org/10.1038/387272a0>, 1997.

Farnelid, H., Turk-Kubo, K., Muñoz-Marín, M., and Zehr, J.: New insights into the ecology of the globally  
significant uncultured nitrogen-fixing symbiont UCYN-A, Aquat. Microb. Ecol., 77, 125–138,  
<https://doi.org/10.3354/ame01794>, 2016.

Fontela, M., Fernández-Román, D., Broullón, E., Farnelid, H., Fernández-Carrera, A., Marañón, E.,  
Martínez-García, S., Rodríguez-Ramos, T., Varela, M. M., and Mouriño-Carballido, B.: Puzzling out the  
ecological niche construction for nitrogen fixers in a coastal upwelling system, ISME Commun., 5,  
ycaf018, <https://doi.org/10.1093/ismeco/ycaf018>, 2025.

Foster, R. A., Subramaniam, A., Mahaffey, C., Carpenter, E. J., Capone, D. G., and Zehr, J. P.: Influence of  
the Amazon River plume on distributions of free-living and symbiotic cyanobacteria in the western  
tropical north Atlantic Ocean, Limnol. Oceanogr., 52, 517–532,  
<https://doi.org/10.4319/lo.2007.52.2.0517>, 2007.

- Fu, F., Yu, E., Garcia, N., Gale, J., Luo, Y., Webb, E. A., and Hutchins, D. A.: Differing responses of marine  
715 N<sub>2</sub> fixers to warming and consequences for future diazotroph community structure, *Aquat. Microb. Ecol.*,  
72, 33–46, <https://doi.org/10.3354/ame01683>, 2014.
- Fulweiler, R. W., Rinehart, S., Taylor, J., Kelly, M. C., Berberich, M. E., Ray, N. E., Oczkowski, A., Balint,  
S., Benavides, M., Church, M. J., Locks, B., Newell, S., Olofsson, M., Oppong, J. C., Roley, S. S., Vizza,  
C., Wilson, S. T., Chowdhury, S., Groffman, P., Scott, J. T., and Marcarelli, A. M.: Global importance  
720 of nitrogen fixation across inland and coastal waters, *Science*, 388, 1205–1209,  
<https://doi.org/10.1126/science.adt1511>, 2025.
- Gao, J., Bi, R., Sachs, J. P., Wang, Y., Ding, Y., Che, H., Zhang, J., Yao, P., Shi, J., and Zhao, M.: Assessing  
the interaction of oceanic and riverine processes on coastal phytoplankton dynamics in the East China  
Sea, *Mar. Life Sci. Technol.*, 7, 157–175, <https://doi.org/10.1007/s42995-024-00260-y>, 2025.
- 725 Garcia, N. S., Fu, F.-X., Breene, C. L., Yu, E. K., Bernhardt, P. W., Mulholland, M. R., and Hutchins, D. A.:  
Combined effects of CO<sub>2</sub> and light on large and small isolates of the unicellular N<sub>2</sub>-fixing  
cyanobacterium *Crocospaera watsonii* from the western tropical Atlantic Ocean, *Eur. J. Phycol.*, 48,  
128–139, <https://doi.org/10.1080/09670262.2013.773383>, 2013.
- Gérikas Ribeiro, C., Lopes Dos Santos, A., Marie, D., Pereira Brandini, F., and Vaultot, D.: Small eukaryotic  
730 phytoplankton communities in tropical waters off Brazil are dominated by symbioses between  
Haptophyta and nitrogen-fixing cyanobacteria, *ISME J.*, 12, 1360–1374,  
<https://doi.org/10.1038/s41396-018-0050-z>, 2018.
- Goebel, N. L., Turk, K. A., Achilles, K. M., Paerl, R., Hewson, I., Morrison, A. E., Montoya, J. P., Edwards,  
C. A., and Zehr, J. P.: Abundance and distribution of major groups of diazotrophic cyanobacteria and  
735 their potential contribution to N<sub>2</sub> fixation in the tropical Atlantic Ocean: Diazotrophic cyanobacteria in  
the tropical North Atlantic, *Environ. Microbiol.*, 12, 3272–3289, <https://doi.org/10.1111/j.1462-2920.2010.02303.x>, 2010.
- Gomes, H. D. R., Xu, Q., Ishizaka, J., Carpenter, E. J., Yager, P. L., and Goes, J. I.: The influence of riverine  
nutrients in niche partitioning of phytoplankton communities—A contrast between the Amazon River  
740 plume and the Changjiang (Yangtze) River Diluted Water of the East China Sea, *Front. Mar. Sci.*, 5, 343,

<https://doi.org/10.3389/fmars.2018.00343>, 2018.

Gradoville, M. R., Bombar, D., Crump, B. C., Letelier, R. M., Zehr, J. P., and White, A. E.: Diversity and activity of nitrogen-fixing communities across ocean basins, *Limnol. Oceanogr.*, 62, 1895–1909, <https://doi.org/10.1002/lno.10542>, 2017.

745 Gradoville, M. R., Cabello, A. M., Wilson, S. T., Turk-Kubo, K. A., Karl, D. M., and Zehr, J. P.: Light and depth dependency of nitrogen fixation by the non-photosynthetic, symbiotic cyanobacterium UCYN-A, *Environ. Microbiol.*, 23, 4518–4531, <https://doi.org/10.1111/1462-2920.15645>, 2021.

Gradoville, M. R., Dugenne, M., Hynes, A. M., Zehr, J. P., and White, A. E.: Empirical relationship between *nifH* gene abundance and diazotroph cell concentration in the North Pacific Subtropical Gyre, *J. Phycol.*, 750 58, 829–833, <https://doi.org/10.1111/jpy.13289>, 2022.

Großkopf, T., Mohr, W., Baustian, T., Schunck, H., Gill, D., Kuypers, M. M. M., Lavik, G., Schmitz, R. A., Wallace, D. W. R., and LaRoche, J.: Doubling of marine dinitrogen-fixation rates based on direct measurements, *Nature*, 488, 361–364, <https://doi.org/10.1038/nature11338>, 2012.

Guo, L., Chen, Y., Wang, F., Meng, X., Xu, Z., and Zhuang, G.: Effects of Asian dust on the atmospheric input of trace elements to the East China Sea, *Mar. Chem.*, 163, 19–27, 755 <https://doi.org/10.1016/j.marchem.2014.04.003>, 2014.

Hagino, K., Onuma, R., Kawachi, M., and Horiguchi, T.: Discovery of an endosymbiotic nitrogen-fixing cyanobacterium UCYN-A in *Braarudosphaera bigelowii* (Prymnesiophyceae), *PLoS One*, 8, e81749, <https://doi.org/10.1371/journal.pone.0081749>, 2013.

760 Henke, B. A., Turk-Kubo, K. A., Bonnet, S., and Zehr, J. P.: Distributions and abundances of sublineages of the N<sub>2</sub>-fixing cyanobacterium *Candidatus Atelocyanobacterium thalassa* (UCYN-A) in the New Caledonian Coral Lagoon, *Front. Microbiol.*, 9, 554, <https://doi.org/10.3389/fmicb.2018.00554>, 2018.

Illinois, E.: Psych: Community ecology package, R package version 2.5.6, <https://CRAN.R-project.org/package=psych>, 2025.

765 Irwin, A. J., Nelles, A. M., and Finkel, Z. V.: Phytoplankton niches estimated from field data, *Limnol. Oceanogr.*, 57, 787–797, <https://doi.org/10.4319/lo.2012.57.3.0787>, 2012.

Irwin, A. J., Finkel, Z. V., Müller-Karger, F. E., and Troccoli Ghinaglia, L.: Phytoplankton adapt to changing

ocean environments, *Proc. Natl. Acad. Sci.*, 112, 5762–5766, <https://doi.org/10.1073/pnas.1414752112>, 2015.

770 Jiang, R., Hong, H., Wen, Z., Yu, X., Browning, T. J., Chen, Z., Shang, Y., Liu, X., Cao, Z., Achterberg, E. P., Dai, M., and Shi, D.: Significant contribution of the unicellular cyanobacterium UCYN-B to oceanic nitrogen fixation, *Natl. Sci. Rev.*, 12, nwaf337, <https://doi.org/10.1093/nsr/nwaf337>, 2025.

Jiang, Z., Chen, J., Zhou, F., Zhai, H., Zhang, D., and Yan, X.: Summer distribution patterns of *Trichodesmium* spp. in the Changjiang (Yangtze River) Estuary and adjacent East China Sea shelf, *Oceanologia*, 59, 775 248–261, <https://doi.org/10.1016/j.oceano.2017.02.001>, 2017.

Jiang, Z., Li, H., Zhai, H., Zhou, F., Chen, Q., Chen, J., Zhang, D., and Yan, X.: Seasonal and spatial changes in *Trichodesmium* associated with physicochemical properties in East China Sea and southern Yellow Sea, *J. Geophys. Res.-Biogeo.*, 123, 509–530, <https://doi.org/10.1002/2017JG004275>, 2018.

Jiang, Z., Chen, J., Zhai, H., Zhou, F., Yan, X., Zhu, Y., Xuan, J., Shou, L., and Chen, Q.: Kuroshio shape 780 composition and distribution of filamentous diazotrophs in the East China Sea and southern Yellow Sea, *J. Geophys. Res.-Oceans*, 124, 7421–7436, <https://doi.org/10.1029/2019JC015413>, 2019.

Jiang, Z., Zhu, Y., Sun, Z., Zhai, H., Zhou, F., Yan, X., Zeng, J., Chen, J., and Chen, Q.: Enhancement of summer nitrogen fixation by the Kuroshio intrusion in the East China Sea and southern Yellow Sea, *J. Geophys. Res.-Biogeo.*, <https://doi.org/10.1029/2022JG007287>, 2023a.

785 Jiang, Z., Zhu, Y., Sun, Z., Zhai, H., Zhou, F., Yan, X., Chen, Q., Chen, J., and Zeng, J.: Size-fractionated N<sub>2</sub> fixation off the Changjiang Estuary during summer, *Front. Microbiol.*, 14, 1189410, <https://doi.org/10.3389/fmicb.2023.1189410>, 2023b.

Kantor, E. J. H., Robicheau, B. M., Tolman, J., Archibald, J. M., and LaRoche, J.: Metagenomics reveals the genetic diversity between sublineages of UCYN-A and their algal host plastids, *ISME Commun.*, 4, 790 ycae150, <https://doi.org/10.1093/ismeco/ycae150>, 2024.

Karl, D., Letelier, R., Tupas, L., Dore, J., Christian, J., and Hebel, D.: The role of nitrogen fixation in biogeochemical cycling in the subtropical North Pacific Ocean, *Nature*, 388, 533–538, <https://doi.org/10.1038/41474>, 1997.

Kitajima, S., Furuya, K., Hashihama, F., Takeda, S., and Kanda, J.: Latitudinal distribution of diazotrophs

795 and their nitrogen fixation in the tropical and subtropical western North Pacific, *Limnol. Oceanogr.*, 54,  
537–547, <https://doi.org/10.4319/lo.2009.54.2.0537>, 2009.

Knapp, A., Dekaezemacker, J., Bonnet, S., Sohm, J., and Capone, D.: Sensitivity of *Trichodesmium*  
*erythraeum* and *Crocospheera watsonii* abundance and N<sub>2</sub> fixation rates to varying NO<sub>3</sub><sup>-</sup> and PO<sub>4</sub><sup>3-</sup>  
concentrations in batch cultures, *Aquat. Microb. Ecol.*, 66, 223–236, <https://doi.org/10.3354/ame01577>,  
800 2012.

Knapp, A. N.: The sensitivity of marine N<sub>2</sub> fixation to dissolved inorganic nitrogen, *Front. Microbiol.*, 3, 374,  
<https://doi.org/10.3389/fmicb.2012.00374>, 2012.

Langlois, R. J., Hümmer, D., and LaRoche, J.: Abundances and distributions of the dominant *nifH* phylotypes  
in the northern Atlantic Ocean, *Appl. Environ. Microbiol.*, 74, 1922–1931,  
805 <https://doi.org/10.1128/AEM.01720-07>, 2008.

Lawrence, R. M., Shrikumar, A., Le Roy, E., Swift, J. H., Lam, P. J., Cutter, G., and Casciotti, K. L.: Water  
mass analysis of the 2018 US GEOTRACES Pacific Meridional Transect (GP15), ESS Open Archive  
[preprint], <https://doi.org/10.1002/essoar.10510438.1>, 07 February 2022.

Lee Chen, Y., Chen, H., and Lin, Y.: Distribution and downward flux of *Trichodesmium* in the South China  
810 Sea as influenced by the transport from the Kuroshio current, *Mar. Ecol. Prog. Ser.*, 259, 47–57,  
<https://doi.org/10.3354/meps259047>, 2003.

Lee Chen, Y., Chen, H.-Y., Lin, Y.-H., Yong, T.-C., Taniuchi, Y., and Tuo, S.: The relative contributions of  
unicellular and filamentous diazotrophs to N<sub>2</sub> fixation in the South China Sea and the upstream Kuroshio,  
*Deep-Sea Res. Pt. I*, 85, 56–71, <https://doi.org/10.1016/j.dsr.2013.11.006>, 2014.

815 Li, L., Wu, C., Huang, D., Ding, C., Wei, Y., and Sun, J.: Integrating stochastic and deterministic process in  
the biogeography of N<sub>2</sub>-fixing cyanobacterium *Candidatus Atelocyanobacterium* *Thalassa*, *Front.*  
*Microbiol.*, 12, 654646, <https://doi.org/10.3389/fmicb.2021.654646>, 2021.

Lin, F., Chen, M., Yang, W., Zhang, R., Zheng, M., Qiu, Y., Tong, J., Lin, Z., and Zhang, X.: Biological N<sub>2</sub>  
fixation in the East China Sea in spring 2009, *J. Appl. Oceanogr.*, 32, 445–454.  
820 <https://doi.org/10.3969/J.ISSN.2095-4972.2013.04.001>, 2013.

Litchman, E., Edwards, K., Klausmeier, C., and Thomas, M.: Phytoplankton niches, traits and eco-

evolutionary responses to global environmental change, *Mar. Ecol. Prog. Ser.*, 470, 235–248, <https://doi.org/10.3354/meps09912>, 2012.

Liu, Z., Gan, J., Hu, J., Wu, H., Cai, Z., and Deng, Y.: Progress of studies on circulation dynamics in the East China Sea: The Kuroshio exchanges with the shelf currents, *Front. Mar. Sci.*, 8, 620910, <https://doi.org/10.3389/fmars.2021.620910>, 2021.

Locarnini, R. A., Mishonov, A. V., Baranova, O. K., Reagan, J. R., Boyer, T. P., Seidov, D., Wang, Z., Garcia, H. E., Bouchard, C., Cross, S. L., Paver, C. R., and Dukhovskoy, D.: World Ocean Atlas 2023, Volume 1: Temperature, <https://doi.org/10.25923/54bh-1613>, 2024.

Lu, Y., Wen, Z., Shi, D., Chen, M., Zhang, Y., Bonnet, S., Li, Y., Tian, J., and Kao, S.-J.: Effect of light on N<sub>2</sub> fixation and net nitrogen release of *Trichodesmium* in a field study, *Biogeosciences*, 15, 1–12, <https://doi.org/10.5194/bg-15-1-2018>, 2018.

Lu, Y., Wen, Z., Shi, D., Lin, W., Bonnet, S., Dai, M., and Kao, S.: Biogeography of N<sub>2</sub> fixation influenced by the western boundary current intrusion in the South China Sea, *J. Geophys. Res.-Oceans*, 124, 6983–6996, <https://doi.org/10.1029/2018jc014781>, 2019.

Luo, Y.-W., Doney, S. C., Anderson, L. A., Benavides, M., Berman-Frank, I., Bode, A., Bonnet, S., Boström, K. H., Böttjer, D., Capone, D. G., Carpenter, E. J., Chen, Y. L., Church, M. J., Dore, J. E., Falcón, L. I., Fernández, A., Foster, R. A., Furuya, K., Gómez, F., Gundersen, K., Hynes, A. M., Karl, D. M., Kitajima, S., Langlois, R. J., LaRoche, J., Letelier, R. M., Marañón, E., McGillicuddy, D. J., Moisander, P. H., Moore, C. M., Mouriño-Carballido, B., Mulholland, M. R., Needoba, J. A., Orcutt, K. M., Poulton, A. J., Rahav, E., Raimbault, P., Rees, A. P., Riemann, L., Shiozaki, T., Subramaniam, A., Tyrrell, T., Turk-Kubo, K. A., Varela, M., Villareal, T. A., Webb, E. A., White, A. E., Wu, J., and Zehr, J. P.: Database of diazotrophs in global ocean: abundance, biomass and nitrogen fixation rates, *Earth Syst. Sci. Data*, 4, 47–73, <https://doi.org/10.5194/essd-4-47-2012>, 2012.

Mohr, W., Großkopf, T., Wallace, D. W. R., and LaRoche, J.: Methodological underestimation of oceanic nitrogen fixation rates, *PLoS One*, 5, e12583, <https://doi.org/10.1371/journal.pone.0012583>, 2010.

Moisander, P. H., Beinart, R. A., Voss, M., and Zehr, J. P.: Diversity and abundance of diazotrophic microorganisms in the South China Sea during intermonsoon, *ISME J.*, 2, 954–967,



<https://doi.org/10.1038/ismej.2008.51>, 2008.

850 Moisander, P. H., Beinart, R. A., Hewson, I., White, A. E., Johnson, K. S., Carlson, C. A., Montoya, J. P., and  
Zehr, J. P.: Unicellular cyanobacterial distributions broaden the oceanic N<sub>2</sub> fixation domain, *Science*,  
327, 1512–1514, <https://doi.org/10.1126/science.1185468>, 2010.

Moisander, P. H., Serros, T., Paerl, R. W., Beinart, R. A., and Zehr, J. P.: Gammaproteobacterial diazotrophs  
and *nifH* gene expression in surface waters of the South Pacific Ocean, *ISME J.*, 8, 1962–1973,  
855 <https://doi.org/10.1038/ismej.2014.49>, 2014.

Montoya, J. P., Voss, M., Hler, P. K., and Capone, D. G.: A simple, high-precision, high-sensitivity tracer  
assay for N<sub>2</sub> fixation, *Appl. Environ. Microbiol.*, 62, 986–993, [https://doi.org/10.1128/aem.62.3.986-](https://doi.org/10.1128/aem.62.3.986-993.1996)  
993.1996, 1996.

Muñoz-Marín, M. D. C., Magasin, J. D., and Zehr, J. P.: Open ocean and coastal strains of the N<sub>2</sub>-fixing  
860 cyanobacterium UCYN-A have distinct transcriptomes, *PLoS One*, 18, e0272674,  
<https://doi.org/10.1371/journal.pone.0272674>, 2023.

Nguyen, A., Ustick, L. J., Larkin, A. A., and Martiny, A. C.: Global phylogeography and microdiversity of  
the marine diazotrophic cyanobacteria *Trichodesmium* and UCYN-A, *mSphere*, 10, e00245-25,  
<https://doi.org/10.1128/msphere.00245-25>, 2025.

865 Nguyen-Ngoc, L., Weber, S. C., Doan-Nhu, H., Subramaniam, A., Voss, M., and Montoya, J. P.: Diatom-  
diazotroph associations in hydrographically defined habitats of the South China Sea, *Hydrobiologia*,  
850, 4195–4212, <https://doi.org/10.1007/s10750-023-05290-8>, 2023.

Oksanen, J., Simpson, G. L., Blanchet, F. G., Kindt, R., Legendre, P., Minchin, P. R., O'Hara, R. B., Solymos,  
P., Stevens, M. H. H., Szoecs, E., Wagner, H., Barbour, M., Bedward, M., Bolker, B., Borcard, D.,  
870 Carvalho, G., Chirico, M., De Caceres, M., Durand, S., Evangelista, H. B. A., FitzJohn, R., Friendly, M.,  
Furneaux, B., Hannigan, G., Hill, M. O., Lahti, L., McGlinn, D., Ouellette, M.-H., Ribeiro Cunha, E.,  
Smith, T., Stier, A., Ter Braak, C. J. F., and Weedon, J.: *Vegan: Community ecology package*, R package  
version 2.6-8, <https://CRAN.R-project.org/package=vegan>, 2024.

Phillips, S. J., Anderson, R. P., and Schapire, R. E.: Maximum entropy modeling of species geographic  
875 distributions, *Ecol. Model.*, 190, 231–259, <https://doi.org/10.1016/j.ecolmodel.2005.03.026>, 2006.

Qiu, B. and Imasato, N.: A numerical study on the formation of the Kuroshio Counter Current and the Kuroshio Branch Current in the East China Sea, *Cont. Shelf Res.*, 10, 165–184, [https://doi.org/10.1016/0278-4343\(90\)90028-K](https://doi.org/10.1016/0278-4343(90)90028-K), 1990.

Reagan, J. R., Seidov, D., Wang, Z., Dukhovskoy, D., Boyer, T. P., Locarnini, R. A., Baranova, O. K.,  
880 Mishonov, A. V., Garcia, H. E., Bouchard, C., Cross, S. L., and Paver, C. R.: World Ocean Atlas 2023, Volume 2: Salinity, <https://doi.org/10.25923/70qt-9574>, 2024.

Rivero-Calle, S., Del Castillo, C. E., Gnanadesikan, A., Dezfali, A., Zaitchik, B., and Johns, D. G.: Interdecadal *Trichodesmium* variability in cold North Atlantic waters, *Glob. Biogeochem. Cycles*, 30, 1620–1638, <https://doi.org/10.1002/2015GB005361>, 2016.

885 Rodier, M., and Le Borgne, R.: Population dynamics and environmental conditions affecting *Trichodesmium* spp. (filamentous cyanobacteria) blooms in the south–west lagoon of New Caledonia, *J. Exp. Mar. Biol. Ecol.*, 358, 20–32, <https://doi.org/10.1016/j.jembe.2008.01.016>, 2008.

Rodier, M., and Le Borgne, R.: Population and trophic dynamics of *Trichodesmium thiebautii* in the SE lagoon of New Caledonia. Comparison with *T. erythraeum* in the SW lagoon, *Mar. Pollut. Bull.*, 61,  
890 349–359, <https://doi.org/10.1016/j.marpolbul.2010.06.018>, 2010.

Sargent, E. C., Hitchcock, A., Johansson, S. A., Langlois, R., Moore, C. M., LaRoche, J., Poulton, A. J., and Bibby, T. S.: Evidence for polyploidy in the globally important diazotroph *Trichodesmium*, *FEMS Microbiol. Lett.*, 363, fnw244, <https://doi.org/10.1093/femsle/fnw244>, 2016.

Sato, T., Shiozaki, T., Takino, S., Hidaka, K., Yamaguchi, T., Ito, D., Ambe, D., Sogawa, S., Setou, T., Shimizu, Y., Kodama, T., and Takahashi, K.: Revisiting the distribution and total amount of nitrogen fixation  
895 across the Kuroshio, *Limnol. Oceanogr. Lett.*, 10, 70013, <https://doi.org/10.1002/lol2.70013>, 2025.

Sato, T., Yamaguchi, T., Hidataka, K., Sogawa, S., Setou, T., Kodama, T., Shiozaki, T., and Takahashi, K.: Grazing mortality as a controlling factor in the uncultured non-cyanobacterial diazotroph (Gamma A) around the Kuroshio region, *Biogeosciences*, 22, 625–639, <https://doi.org/10.5194/bg-22-625-2025>,  
900 2025.

Schvarcz, C. R., Wilson, S. T., Caffin, M., Stancheva, R., Li, Q., Turk-Kubo, K. A., White, A. E., Karl, D. M., Zehr, J. P., and Steward, G. F.: Overlooked and widespread pennate diatom-diazotroph symbioses

in the sea, Nat. Commun., 13, 799, <https://doi.org/10.1038/s41467-022-28065-6>, 2022.

Schvarcz, C. R., Stancheva, R., Turk-Kubo, K. A., Wilson, S. T., Zehr, J. P., Edwards, K. F., Steward, G. F.,  
905 Archibald, J. M., Oatley, G., Sinclair, E., Santos, C., Paulini, M., Aunin, E., Gettle, N., Niu, H., McKenna,  
V., O'Brien, R., Wellcome Sanger Institute Tree of Life Management, Samples and Laboratory Team,  
Wellcome Sanger Institute Scientific Operations: Sequencing Operations, Wellcome Sanger Institute  
Tree of Life Core Informatics Team, EBI Aquatic Symbiosis Genomics Data Portal Team, and Aquatic  
Symbiosis Genomics Project Leadership: The genome sequences of the marine diatom *Epithemia*  
910 *pelagica* strain UHM3201 (Schvarcz, Stancheva & Steward, 2022) and its nitrogen-fixing,  
endosymbiotic cyanobacterium, Wellcome Open Res., 9, 232,  
<https://doi.org/10.12688/wellcomeopenres.21534.1>, 2024.

Shao, Z., and Luo, Y.-W.: Controlling factors on the global distribution of a representative marine non-  
cyanobacterial diazotroph phylotype (Gamma A), Biogeosciences, 19, 2939–2952,  
915 <https://doi.org/10.5194/bg-19-2939-2022>, 2022.

Shao, Z., Xu, Y., Wang, H., Luo, W., Wang, L., Huang, Y., Agawin, N. S. R., Ahmed, A., Benavides, M.,  
Bentzon-Tilia, M., Berman-Frank, I., Berthelot, H., Biegala, I. C., Bif, M. B., Bode, A., Bonnet, S.,  
Bronk, D. A., Brown, M. V., Campbell, L., Capone, D. G., Carpenter, E. J., Cassar, N., Chang, B. X.,  
Chappell, D., Chen, Y. L., Church, M. J., Cornejo-Castillo, F. M., Detoni, A. M. S., Doney, S. C., Dupouy,  
920 C., Estrada, M., Fernandez, C., Fernández-Castro, B., Fonseca-Batista, D., Foster, R. A., Furuya, K.,  
Garcia, N., Goto, K., Gago, J., Gradoville, M. R., Hamersley, M. R., Henke, B. A., Hörstmann, C.,  
Jayakumar, A., Jiang, Z., Kao, S.-J., Karl, D. M., Kittu, L. R., Knapp, A. N., Kumar, S., LaRoche, J.,  
Liu, H., Liu, J., Lory, C., Löscher, C. R., Marañón, E., Messer, L. F., Mills, M. M., Mohr, W., Moisander,  
P. H., Mahaffey, C., Moore, R., Mouriño-Carballido, B., Mulholland, M. R., Nakaoka, S., Needoba, J.  
925 A., Raes, E. J., Rahav, E., Ramírez-Cárdenas, T., Reeder, C. F., Riemann, L., Riou, V., Robidart, J. C.,  
Sarma, V. V. S. S., Sato, T., Saxena, H., Selden, C., Seymour, J. R., Shi, D., Shiozaki, T., Singh, A.,  
Sipler, R. E., Sun, J., Suzuki, K., Takahashi, K., Tan, Y., Tang, W., Tremblay, J.-É., Turk-Kubo, K., Wen,  
Z., White, A. E., Wilson, S. T., Yoshida, T., Zehr, J. P., Zhang, R., Zhang, Y., and Luo, Y.-W.: Global  
oceanic diazotroph database version 2 and elevated estimate of global oceanic N<sub>2</sub> fixation, Earth Syst.

- 930 Sci. Data, 15, 3673–3709, <https://doi.org/10.5194/essd-15-3673-2023>, 2023.
- Shen, H., Wan, X. S., Zou, W., Dai, M., Xu, M. N., and Kao, S.-J.: Light-driven integration of diazotroph-derived nitrogen in euphotic nitrogen cycle, Nat. Commun., 15, 9193, <https://doi.org/10.1038/s41467-024-53067-x>, 2024.
- Shiozaki, T., Ijichi, M., Kodama, T., Takeda, S., and Furuya, K.: Heterotrophic bacteria as major nitrogen  
935 fixers in the euphotic zone of the Indian Ocean, Glob. Biogeochem. Cycles, 28, 1096–1110, <https://doi.org/10.1002/2014GB004886>, 2014.
- Shiozaki, T., Takeda, S., Itoh, S., Kodama, T., Liu, X., Hashihama, F., and Furuya, K.: Why is *Trichodesmium* abundant in the Kuroshio? Biogeosciences, 12, 6931–6943, <https://doi.org/10.5194/bg-12-6931-2015>, 2015.
- 940 Shiozaki, T., Kondo, Y., Yuasa, D., and Takeda, S.: Distribution of major diazotrophs in the surface water of the Kuroshio from northeastern Taiwan to south of mainland Japan, J. Plankton Res., 40, 407–419, <https://doi.org/10.1093/plankt/fby027>, 2018.
- Shrikumar, A., Lawrence, R., Casciotti, K. L.: PYOMPA version 0.3: Technical note, ESS Open Archive [preprint], <https://doi.org/10.1002/essoar.10507053.4>, 04 February 2022.
- 945 Stenegren, M., Berg, C., Padilla, C. C., David, S.-S., Montoya, J. P., Yager, P. L., and Foster, R. A.: Piecewise structural equation model (SEM) disentangles the environmental conditions favoring diatom diazotroph associations (DDAs) in the Western Tropical North Atlantic (WTNA), Front. Microbiol., 8, 810, <https://doi.org/10.3389/fmicb.2017.00810>, 2017.
- Stenegren, M., Caputo, A., Berg, C., Bonnet, S., and Foster, R. A.: Distribution and drivers of symbiotic and  
950 free-living diazotrophic cyanobacteria in the western tropical South Pacific, Biogeosciences, 15, 1559–1578, <https://doi.org/10.5194/bg-15-1559-2018>, 2018.
- Su, H., Yang, R., Zhang, A., and Li, Y.: Dissolved iron distribution and organic complexation in the coastal waters of the East China Sea, Mar. Chem., 173, 208–221, <https://doi.org/10.1016/j.marchem.2015.03.007>, 2015.
- 955 Sun, Z., Zhu, Y., Jiang, Y., Zhai, H., Chen, J., Yan, X., Zeng, J., Chen, Q., and Jiang, Z.: Intrusion of Kuroshio enhances phytoplankton biomass and diversity in the East China Sea, J. Geophys. Res.-Ocean., 130,

e2024JC021337, <https://doi.org/10.1029/2024JC021337>, 2025.

Tang, W., and Cassar, N.: Data-driven modeling of the distribution of diazotrophs in the global ocean, *Geophys. Res. Lett.*, 46, 12258–12269, <https://doi.org/10.1029/2019GL084376>, 2019.

960 Tang, W., Wang, S., Fonseca-Batista, D., Dehairs, F., Gifford, S., Gonzalez, A. G., Gallinari, M., Planquette, H., Sarthou, G., and Cassar, N.: Revisiting the distribution of oceanic N<sub>2</sub> fixation and estimating diazotrophic contribution to marine production, *Nat. Commun.*, 10, 831, <https://doi.org/10.1038/s41467-019-08640-0>, 2019.

Thompson, A., Carter, B. J., Turk-Kubo, K., Malfatti, F., Azam, F., and Zehr, J. P.: Genetic diversity of the unicellular nitrogen-fixing cyanobacteria UCYN-A and its prymnesiophyte host: UCYN-A genetic diversity, *Environ. Microbiol.*, 16, 3238–3249, <https://doi.org/10.1111/1462-2920.12490>, 2014.

Tomczak, M., and Large, D. G. B.: Optimum multiparameter analysis of mixing in the thermocline of the eastern Indian Ocean, *J. Geophys. Res.-Ocean.*, 94, 16141–16149, <https://doi.org/10.1029/JC094iC11p16141>, 1989.

970 Tschitschko, B., Esti, M., Philippi, M., Kidane, A. T., Littmann, S., Kitzinger, K., Speth, D. R., Li, S., Kraberg, A., Tienken, D., Marchant, H. K., Kartal, B., Milucka, J., Mohr, W., and Kuypers, M. M. M.: Rhizobia–diatom symbiosis fixes missing nitrogen in the ocean, *Nature*, 630, 899–904, <https://doi.org/10.1038/s41586-024-07495-w>, 2024.

Tuo, S., Chen, Y., and Chen, H.: Low nitrate availability promotes diatom diazotroph associations in the marginal seas of the western Pacific, *Aquat. Microb. Ecol.*, 73, 135–150, <https://doi.org/10.3354/ame01715>, 2014.

Tuo, S.-H., Mulholland, M. R., Chen, Y.-L. L., Chappell, P. D., and Chen, H.-Y.: Patterns in *Rhizosolenia*- and *Guinardia*-associated *Richelia* abundances in the tropical marginal seas of the western North Pacific, *J. Plankton Res.*, 43, 338–352, <https://doi.org/10.1093/plankt/fbab022>, 2021.

980 Turk-Kubo, K. A., Achilles, K. M., Serros, T. R. C., Ochiai, M., Montoya, J. P., and Zehr, J. P.: Nitrogenase (*nifH*) gene expression in diazotrophic cyanobacteria in the tropical North Atlantic in response to nutrient amendments, *Front. Microbiol.*, 3, <https://doi.org/10.3389/fmicb.2012.00386>, 2012.

Turk-Kubo, K. A., Frank, I. E., Hogan, M. E., Desnues, A., Bonnet, S., and Zehr, J. P.: Diazotroph community

- succession during the VAHINE mesocosm experiment (New Caledonia lagoon), *Biogeosciences*, 12,  
985 7435–7452, <https://doi.org/10.5194/bg-12-7435-2015>, 2015.
- Turk-Kubo, K. A., Farnelid, H. M., Shilova, I. N., Henke, B., and Zehr, J. P.: Distinct ecological niches of  
marine symbiotic N<sub>2</sub>-fixing cyanobacterium *Candidatus Atelocyanobacterium thalassa* sublineages, *J.*  
*Phycol.*, 53, 451–461, <https://doi.org/10.1111/jpy.12505>, 2017.
- Turk-Kubo, K. A., Connell, P., Caron, D., Hogan, M. E., Farnelid, H. M., and Zehr, J. P.: In situ diazotroph  
990 population dynamics under different resource ratios in the North Pacific Subtropical Gyre, *Front.*  
*Microbiol.*, 3, 386, <https://doi.org/10.3389/fmicb.2018.01616>, 2018.
- Turk-Kubo, K. A., Mills, M. M., Arrigo, K. R., van Dijken, G., Henke, B. A., Stewart, B., Wilson, S. T., and  
Zehr, J. P.: UCYN-A/haptophyte symbioses dominate N<sub>2</sub> fixation in the Southern California Current  
System, *ISME Commun.*, 1, 42, <https://doi.org/10.1038/s43705-021-00039-7>, 2021.
- 995 Vélez-Belchí, P., Centurioni, L. R., Lee, D.-K., Jan, S., and Nüller, P. P.: Eddy induced Kuroshio intrusions  
onto the continental shelf of the East China Sea, *J. Mar. Res.*, 71, 83–107,  
<https://doi.org/10.1357/002224013807343470>, 2013.
- Wang, W.-L., Moore, J. K., Martiny, A. C., and Primeau, F. W.: Convergent estimates of marine nitrogen  
fixation, *Nature*, 566, 205–211, <https://doi.org/10.1038/s41586-019-0911-2>, 2019.
- 1000 Wasimuddin, Schlaeppli, K., Ronchi, F., Leib, S. L., Erb, M., and Ramette, A.: Evaluation of primer pairs for  
microbiome profiling from soils to humans within the One Health framework, *Mol. Ecol. Resour.*, 20,  
1558–1571, <https://doi.org/10.1111/1755-0998.13215>, 2020.
- Webb, E. A., Ehrenreich, I. M., Brown, S. L., Valois, F. W., and Waterbury, J. B.: Phenotypic and genotypic  
characterization of multiple strains of the diazotrophic cyanobacterium, *Crocospaera watsonii*, isolated  
1005 from the open ocean, *Environ. Microbiol.*, 11, 338–348, <https://doi.org/10.1111/j.1462-2920.2008.01771.x>, 2009.
- Wen, Z., Browning, T. J., Cai, Y., Dai, R., Zhang, R., Du, C., Jiang, R., Lin, W., Liu, X., Cao, Z., Hong, H.,  
Dai, M., and Shi, D.: Nutrient regulation of biological nitrogen fixation across the tropical western North  
Pacific, *Sci. Adv.*, 8, eabl7564, <https://doi.org/10.1126/sciadv.abl7564>, 2022.
- 1010 Wood, S. N.: Fast stable restricted maximum likelihood and marginal likelihood estimation of semiparametric

generalized linear models, J. R. Stat. Soc. B: Stat. Methodol., 73, 3–36, <https://doi.org/10.1111/j.1467-9868.2010.00749.x>, 2011.

1015 Wu, C., Fu, F.-X., Sun, J., Thangaraj, S., and Pujari, L.: Nitrogen fixation by *Trichodesmium* and unicellular diazotrophs in the northern South China Sea and the Kuroshio in summer, Sci. Rep., 8, 2415, <https://doi.org/10.1038/s41598-018-20743-0>, 2018.

Xiao, W., Wang, L., Laws, E., Xie, Y., Chen, J., Liu, X., Chen, B., and Huang, B.: Realized niches explain spatial gradients in seasonal abundance of phytoplankton groups in the South China Sea, Prog. Oceanogr., 162, 223–239, <https://doi.org/10.1016/j.pocean.2018.03.008>, 2018.

1020 Yang, D., Yin, B., Liu, Z., Bai, T., Qi, J., and Chen, H.: Numerical study on the pattern and origins of Kuroshio branches in the bottom water of southern East China Sea in summer, J. Geophys. Res.-Oceans, 117, 2011JC007528, <https://doi.org/10.1029/2011JC007528>, 2012.

Yang, D., Yin, B., Chai, F., Feng, X., Xue, H., Gao, G., and Yu, F.: The onshore intrusion of Kuroshio subsurface water from February to July and a mechanism for the intrusion variation, Prog. Oceanogr., 167, 97–115, <https://doi.org/10.1016/j.pocean.2018.08.004>, 2018.

1025 Yang, H., Cai, J., Wu, L., Guo, H., Chen, Z., Jing, Z., and Gan, B.: The intensifying East China Sea Kuroshio and disappearing Ryukyu Current in a warming climate, Geophys. Res. Lett., 51, e2023GL106944, <https://doi.org/10.1029/2023GL106944>, 2024.

1030 Yin, M., Li, X., Xiao, Z., and Li, C.: Relationships between intensity of the Kuroshio current in the East China Sea and the East Asian winter monsoon, Acta Oceanol. Sin., 37, 8–19, <https://doi.org/10.1007/s13131-018-1240-2>, 2018.

Yu, G.: Scatterpie: Scatter pie plot. R package version 0.2.5, <https://CRAN.R-project.org/package=scatterpie>, 2025.

1035 Yue, J., Noman, M. A., and Sun, J.: Kuroshio intrusion drives the *Trichodesmium* assemblage and shapes the phytoplankton community during spring in the East China Sea, J. Oceanol. Limnol., 39, 536–549, <https://doi.org/10.1007/s00343-020-9344-x>, 2021.

Zehr, J. P. and Capone, D. G.: Changing perspectives in marine nitrogen fixation, Science, 368, eaay9514, <https://doi.org/10.1126/science.aay9514>, 2020.

- Zhang, H., Mai, G., Luo, W., Chen, M., Duan, R., and Shi, T.: Changes in diazotrophic community structure associated with Kuroshio succession in the northern South China Sea, *Biogeosciences*, 21, 2529–2546, <https://doi.org/10.5194/bg-21-2529-2024>, 2024.
- Zhang, L., Liu, Z., Zhang, J., Hong, G. H., Park, Y., and Zhang, H. F.: Reevaluation of mixing among multiple water masses in the shelf: An example from the East China Sea, *Cont. Shelf Res.*, 27, 1969–1979, <https://doi.org/10.1016/j.csr.2007.04.002>, 2007.
- Zhang, R., Chen, M., Cao, J., Ma, Q., Yang, J., and Qiu, Y.: Nitrogen fixation in the East China Sea and southern Yellow Sea during summer 2006, *Mar. Ecol. Prog. Ser.*, 447, 77–86, <https://doi.org/10.3354/meps09509>, 2012.
- Zhang, H., Qin, Y., Deng, B., Cheng, X., and Jiang, X.: Distribution characteristics of *Trichodesmium* in the East China Sea, *J. Appl. Oceanogr.*, 38, 246–251, <https://doi.org/10.3969/J.ISSN.2095-4972.2019.02.012>, 2019.
- Zhong, Y., Liu, X., Xiao, W., Laws, E. A., Chen, J., Wang, L., Liu, S., Zhang, F., and Huang, B.: Phytoplankton community patterns in the Taiwan Strait match the characteristics of their realized niches, *Prog. Oceanogr.*, 186, 102366, <https://doi.org/10.1016/j.pocean.2020.102366>, 2020.
- Zhou, F., Xue, H., Huang, D., Xuan, J., Ni, X., Xiu, P., and Hao, Q.: Cross-shelf exchange in the shelf of the East China Sea, *J. Geophys. Res.-Oceans*, 120, 1545–1572, <https://doi.org/10.1002/2014JC010567>, 2015.



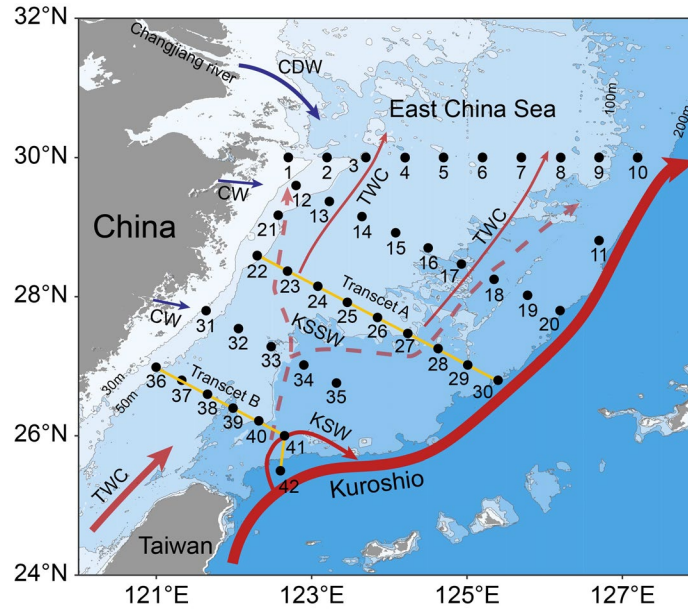

Figure 1. Sampling in the East China Sea (ECS) during the 2023 autumn and 2024 spring cruises. A total of 42 stations along 5 transects were selected for the collection of biological samples and environmental parameters. The station numbers are positioned adjacent to corresponding points. Transects A (yellow line, stations 22–30) and B (yellow line, stations 36–42) were chosen to investigate variations in biological and environmental factors along the vertical gradient extending from inshore to offshore. Major circulations are indicated, including the Changjiang diluted water (CDW), Coastal water (CW), Taiwan warm current (TWC), Kuroshio current, Kuroshio surface water (KSW) and Kuroshio subsurface water (KSSW, dashed arrows) (Yang et al., 2012, 2018). Arrow sizes denote specific discharge rates (Liu et al., 2021). Land topography and ocean bathymetry data were obtained from the General Bathymetric Chart of the Oceans (GEBCO, <https://www.gebco.net/>, last access: 24 January 2025).

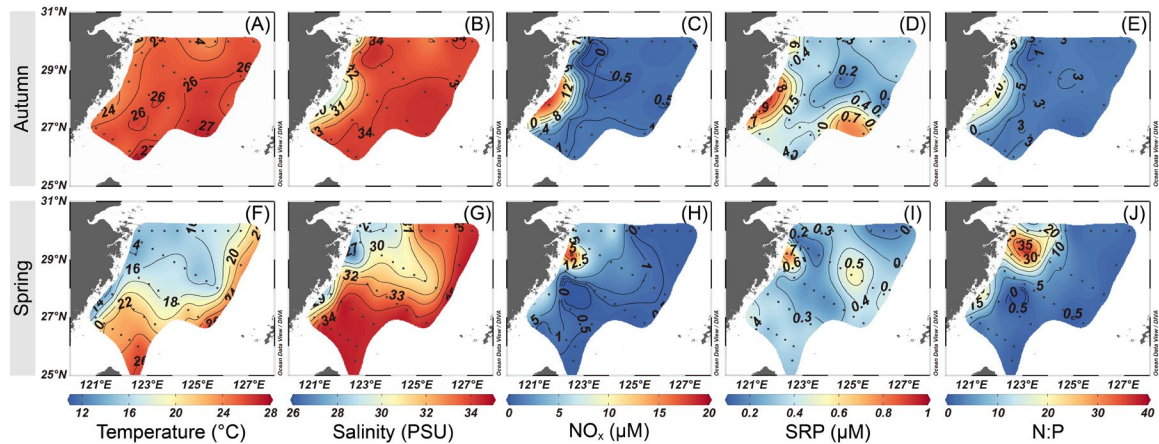

Figure 2. Variations in surface temperature (A, F), salinity (B, G),  $\text{NO}_x$  (C, H), SRP (D, I) and N:P ratio (E, J) during autumn (A–E) and spring (F–J) in the ECS. The map was created using Ocean Data View 5.7.2 (Schlitzer, Reiner, Ocean Data View, <https://odv.awi.de>, last access: 24 January 2025).

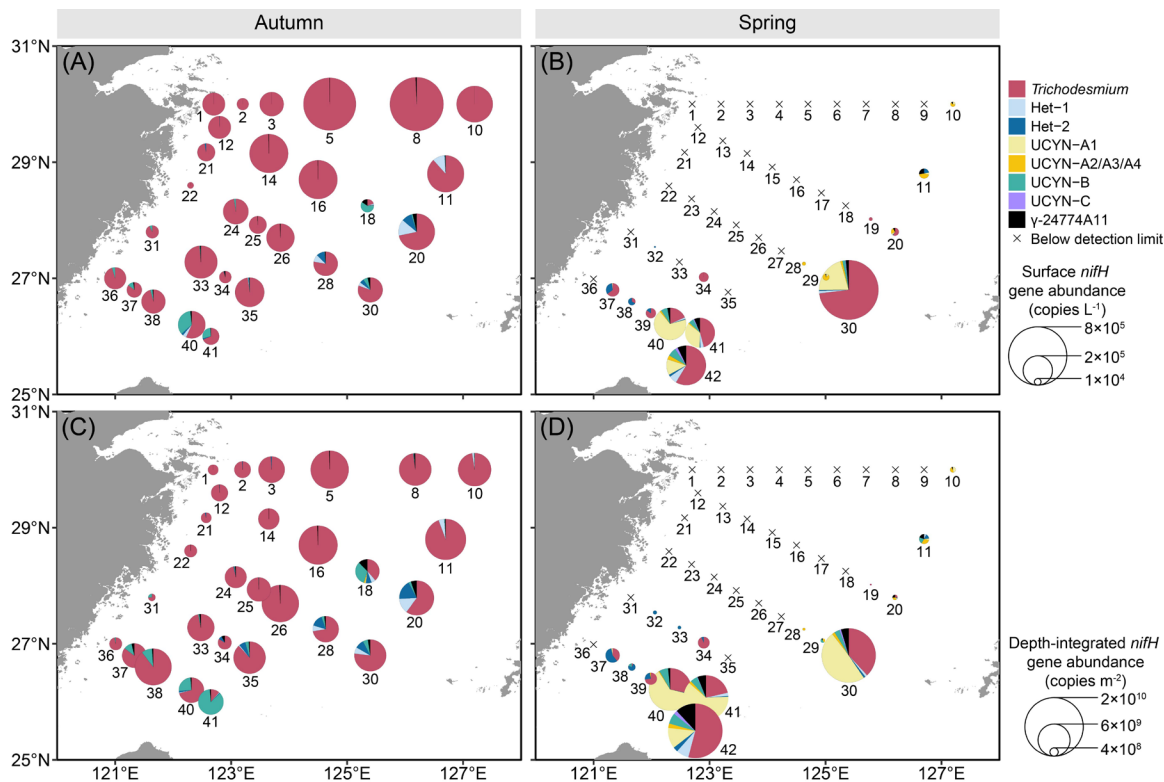

Figure 3. Surface (A, B) and depth-integrated (C, D) abundances of the eight major diazotrophic phylotypes in the East China Sea during autumn and spring as determined based on the quantification of the *nifH* gene (i.e., DNA-based) with TaqMan qPCR. The station numbers are positioned adjacent to corresponding pie charts and crossover points. Land topography was obtained from the General Bathymetric Chart of the Oceans (GEBCO, <https://www.gebco.net/>, last access: 24 January 2025).

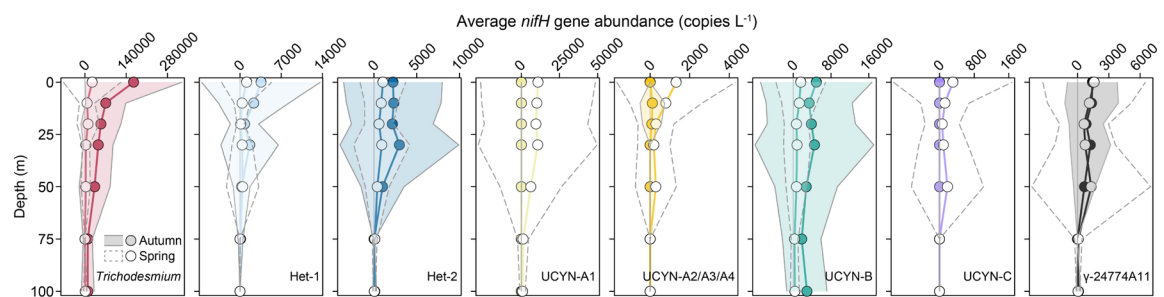

Figure 4. Vertical distributions in the average abundances of the eight major diazotrophic phylotypes in the East China Sea during autumn and spring as determined based on the TaqMan qPCR assay of the *nifH* gene. The grey solid and dashed lines represent  $\pm 1$  standard deviation for autumn and spring, respectively.

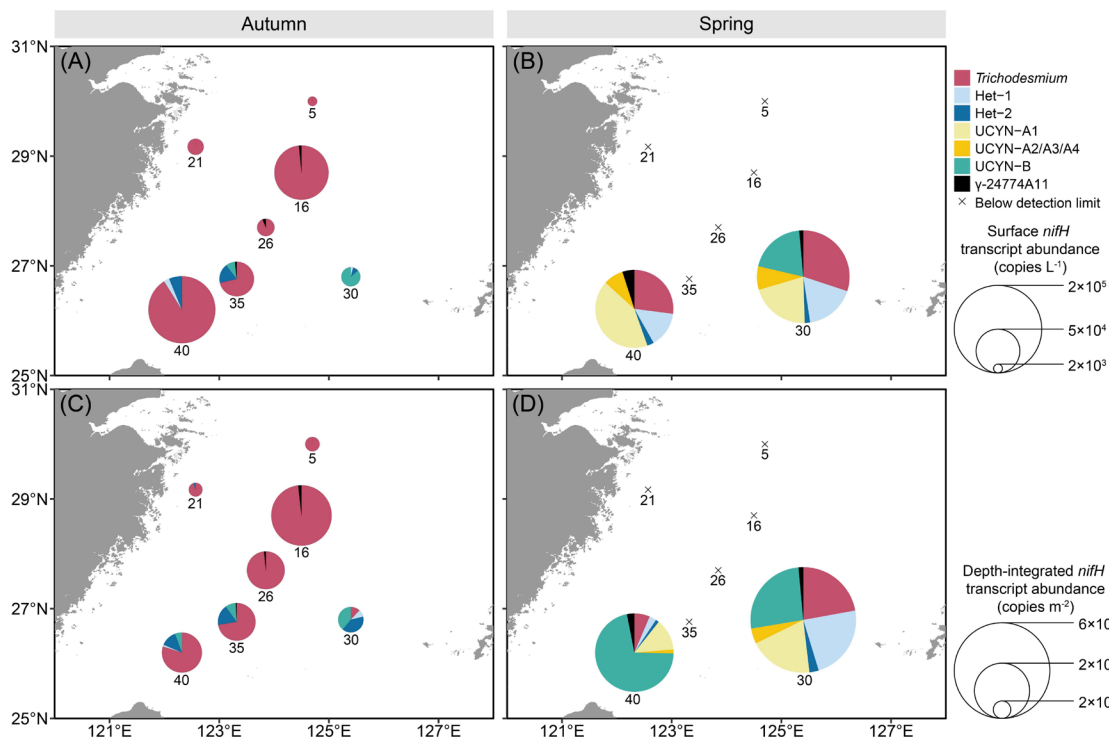

Figure 5. Surface (A, B) and depth-integrated (C, D) abundances of the seven major diazotrophic phylotypes in the East China Sea during autumn and spring as determined based on TaqMan qPCR assay of the *nifH* transcript (i.e., RNA-based). Note that the transcript abundance of UCYN-B was derived from nighttime samples, whereas that of the other groups was from daytime samples. The depth-integrated transcript abundance was calculated based on the integration of the upper 50 m of the water columns. The station numbers are positioned adjacent to corresponding pie charts and crossover points. Land topography was obtained from the General Bathymetric Chart of the Oceans (GEBCO, <https://www.gebco.net/>, last access: 24 January 2025).

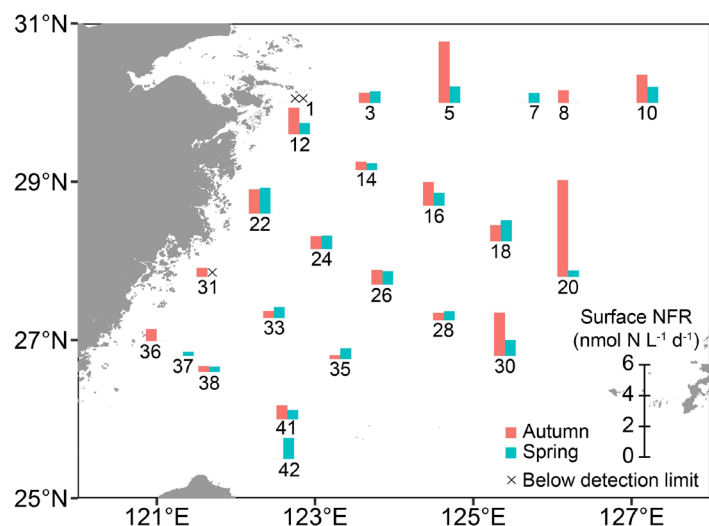

Figure 6.  $N_2$  fixation rates in surface waters at designated stations in the East China Sea during autumn and spring as determined with in situ isotope tracing. The station numbers are positioned adjacent to corresponding bar charts and crossover points. Sampling excluded stations 7, 37 and 42 in autumn, and stations 8 and 36 in spring. Land topography was obtained from the General Bathymetric Chart of the Oceans (GEBCO, <https://www.gebco.net/>, last access: 24 January 2025).

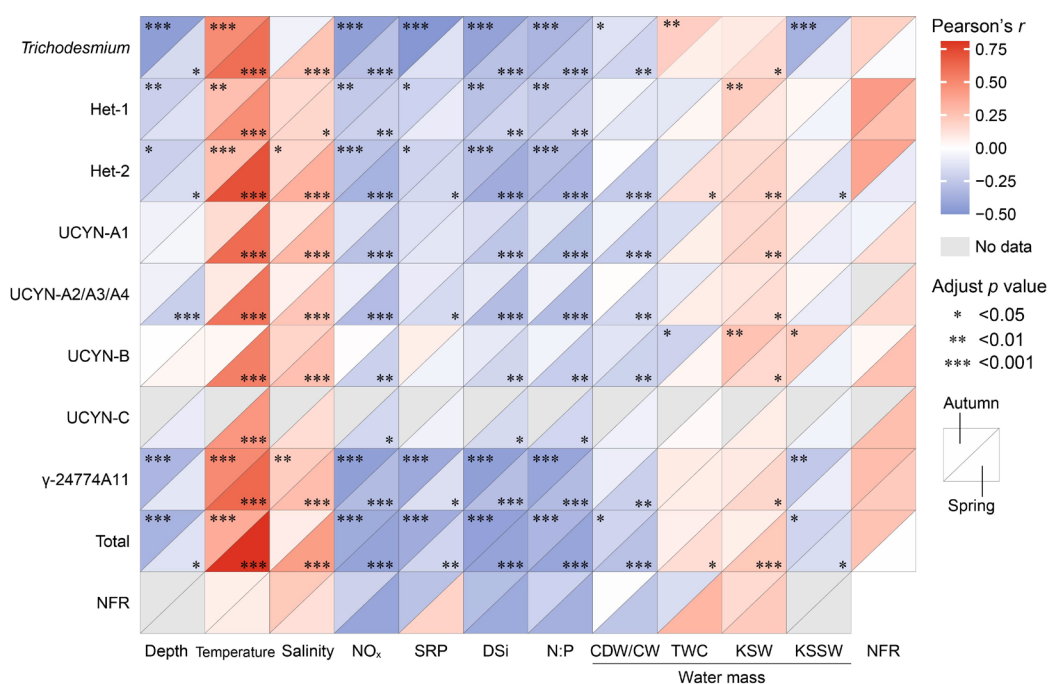

Figure 7. Pearson correlation between diazotroph abundances,  $N_2$  fixation rates (NFRs) and environmental variables in distinct water masses in the East China Sea during autumn and spring. Color gradient denotes Pearson correlation coefficients. Total, total *nifH* gene abundances of eight diazotrophs that detected; CDW, Changjiang diluted water; CW, Coastal water; TWC, Taiwan warm current; KSW, Kuroshio surface water; KSSW, Kuroshio subsurface water.

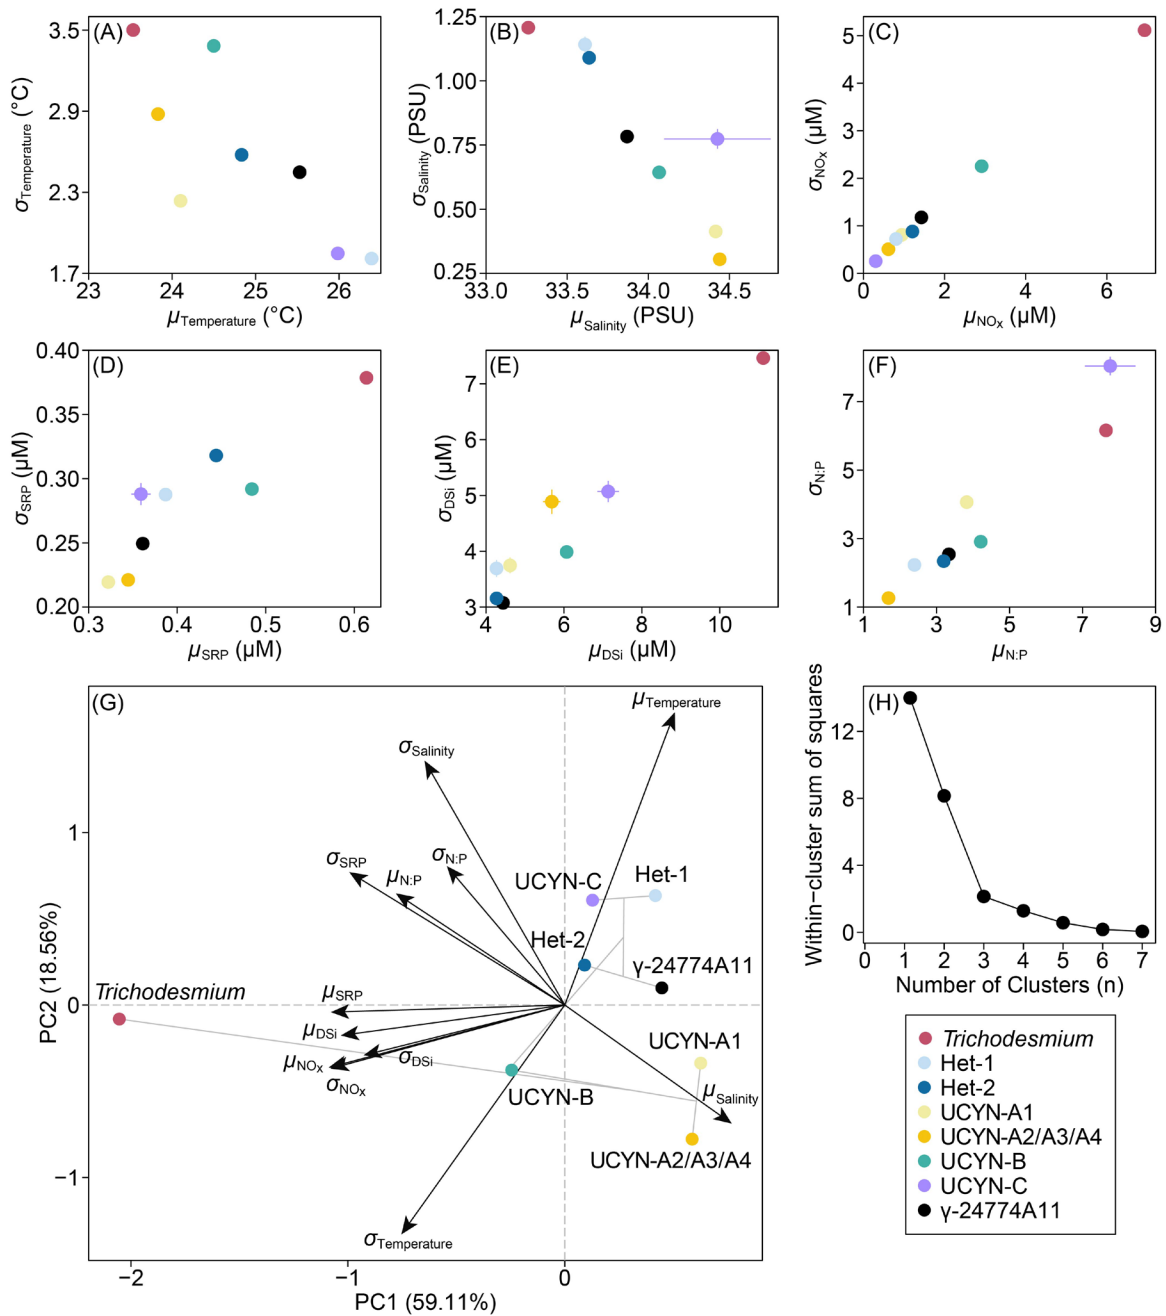

Figure 8. Scatter plots (A–F) and principal component analysis (G) depicting niche mean ( $\mu$ ) and breadth ( $\sigma$ ) of each diazotrophic phylotype relative to environmental variables in the East China Sea. Lines (A–F) across the data points indicate 95% confidence intervals for each variable derived from 1000 bootstrap resampling. Clustering (G) among the diazotrophs is shown in grey lines. Elbow plot (H) for determining the optimal clusters based on within-cluster sum of squares.
