# Supplementary material for: Spatiotemporal heterogeneity in diazotrophic communities reveals novel niche zonation in the East China Sea
Source: Copernicus journal article supplement (doi:10.5194/egusphere-2025-3763), 2025-08-25
Supplement: Supplementary file [file revised_supplement.pdf › file/revised_supplement.pdf]

*Supplement of:*

## **Spatiotemporal heterogeneity in diazotrophic communities reveals novel niche zonation in the East China Sea**

Guangming Mai et al.

*Correspondence to:* Tuo Shi (tuoshi@sdu.edu.cn)

This file includes:

Tables S1 to S6

Figures S1 to S8

References for supplement

The copyright of individual parts of the supplement might differ from the article license.

Table S1. Primer/probe sequences and GeneBank accession numbers for *nifH* standards employed in TaqMan qPCR assays.

| Phylotype            | Forward primer (5'→3')             | Probe (5'→3')                        | Reverse primer (5'→3')         | Accession | Reference                    |
|----------------------|------------------------------------|--------------------------------------|--------------------------------|-----------|------------------------------|
| <i>Trichodesmium</i> | GACGAAGTATTGAAGCCAGG<br>TTTC       | CATTAAGTGTGTTGAATCTGG<br>TGGTCCTGAGC | CGGCCAGCGCAACCTA               | L00689    | Church et al., 2005a         |
| Het-1                | CGGTTTCCGTGGTGTACGTT               | TCCGGTGGTCCTGAGCCTGGT<br>GT          | AATACCACGACCCGCACAAC           | DQ118191  | Church et al., 2005b         |
| Het-2                | TGGTTACCGTGATGTACGTT               | TCTGGTGGTCCTGAGCCTGGT<br>GT          | AATGCCGCGACCAGCACAAC           | DQ225754  | Foster et al., 2007          |
| Het-3                | CGGTTTCCGTGGCGTACGTT               | TCTGGTGGTCCAGAACCTGGT<br>GT          | AATACCACGACCAGCACAAC           | DQ225762  | Foster et al., 2007          |
| UCYN-A1              | AGCTATAACAACGTTTTATGC<br>GTTGA     | TCTGGTGGTCCTGAGCCTGGA                | ACCACGACCAGCACATCCA            | AF059627  | Church et al., 2005a         |
| UCYN-A2/A3/A4        | GGTTACAACAACGTTTTATGT<br>GTTGA     | TCTGGTGGTCCTGAGCCCGG<br>A            | ACCACGACCAGCACATCCA            | KF806604  | Thompson et al., 2014        |
| UCYN-B               | CGTAATGCTCGAAGGGTTTGA              | CAAGTGTGTAGAATCTGGTGG<br>TCCTGAGCC   | CACGACCAGCACAACCAACT           | AF299418  | Moisander et al., 2010       |
| UCYN-C               | GGTATCCTTCAAGTAGTACTT<br>CGTCTAGCT | AAACTACCATTCTTCACTTAG<br>CAG         | TCTACCCGTTTGATGCTACAC<br>ACTAA | HQ455916  | Langlois et al., 2008        |
| $\gamma$ -24774A11   | CGGTAGAGGATCTTGAGCTTG<br>AA        | AAGTGCTTAAGGTTGGCTTTG<br>GCGACA      | CACCTGACTCCACGCACTTG           | EU052318  | Moisander et al., 2008, 2010 |

Table S2. N<sub>2</sub> fixation rates (NFRs) with detection limits in parentheses in the East China Sea during autumn and spring.

| Station | Autumn NFR (nmol N L <sup>-1</sup> d <sup>-1</sup> ) |                          | Spring NFR (nmol N L <sup>-1</sup> d <sup>-1</sup> ) |                          |
|---------|------------------------------------------------------|--------------------------|------------------------------------------------------|--------------------------|
|         | Replicate1                                           | Replicate2               | Replicate1                                           | Replicate2               |
| 1       | 0.39 (0.7) <sup>a</sup>                              | 0.58 (0.69) <sup>a</sup> | 0.07 (0.56) <sup>a</sup>                             | 0.16 (0.41) <sup>a</sup> |
| 3       | 0.66 (0.12)                                          | 0.65 (0.13)              | 0.84 (0.39)                                          | 0.63 (0.4)               |
| 5       | 3.04 (0.76)                                          | 4.9 (0.72)               | 1.08 (0.45)                                          | 1.02 (0.48)              |
| 7       | —                                                    | —                        | 0.7 (0.37)                                           | 0.56 (0.34)              |
| 8       | 0.75 (0.19)                                          | 0.89 (0.13)              | —                                                    | —                        |
| 10      | 2.44 (0.18)                                          | 1.19 (0.18)              | 1.02 (0.28)                                          | 1.04 (0.29)              |
| 12      | 1.72 (0.35)                                          | 1.73 (0.34)              | 0.5 (0.5)                                            | 0.96 (0.47)              |
| 14      | 0.47 (0.17)                                          | 0.6 (0.17)               | 0.08 (0.36) <sup>a</sup>                             | 0.44 (0.37)              |
| 16      | 1.67 (0.2)                                           | 1.41 (0.2)               | 0.68 (0.38)                                          | 0.97 (0.38)              |
| 18      | 0.56 (0.12)                                          | 1.53 (0.11)              | 1.31 (0.21)                                          | 1.39 (0.26)              |
| 20      | 7.47 (0.17)                                          | 5.08 (0.15)              | 0.53 (0.23)                                          | 0.29 (0.2)               |
| 22      | 1.46 (0.35)                                          | 1.68 (0.36)              | 1.75 (0.45)                                          | 1.59 (0.44)              |
| 24      | 0.89 (0.2)                                           | 0.78 (0.18)              | 1.25 (0.44)                                          | 0.48 (0.44)              |
| 26      | 0.99 (0.12)                                          | 0.91 (0.13)              | 1.1 (0.42)                                           | 0.66 (0.48)              |
| 28      | 0.5 (0.16)                                           | 0.45 (0.17)              | 0.78 (0.25)                                          | 0.4 (0.23)               |
| 30      | 3.2 (0.35)                                           | 2.41 (0.36)              | 0.41 (0.24)                                          | 1.64 (0.24)              |
| 31      | 0.58 (0.37)                                          | 0.2 (0.34) <sup>a</sup>  | 0.15 (0.48) <sup>a</sup>                             | 0.36 (0.5) <sup>a</sup>  |
| 33      | 0.48 (0.27)                                          | 0.43 (0.26)              | 0.7 (0.25)                                           | 0.04 (0.2) <sup>a</sup>  |
| 35      | 0.26 (0.16)                                          | 0.24 (0.14)              | 0.7 (0.31)                                           | 0.71 (0.38)              |
| 36      | 0.41 (0.51) <sup>a</sup>                             | 0.78 (0.47)              | —                                                    | —                        |
| 37      | —                                                    | —                        | 0.27 (0.22)                                          | 0.14 (0.24) <sup>a</sup> |
| 38      | 0.16 (0.2) <sup>a</sup>                              | 0.38 (0.17)              | 0.39 (0.24)                                          | 0.31 (0.24)              |
| 41      | 0.58 (0.37)                                          | 1.22 (0.31)              | 0.89 (0.14)                                          | 0.32 (0.25)              |
| 42      | —                                                    | —                        | 1.12 (0.16)                                          | 1.61 (0.17)              |

Note: <sup>a</sup> NFR below the detection limit. — data not available.

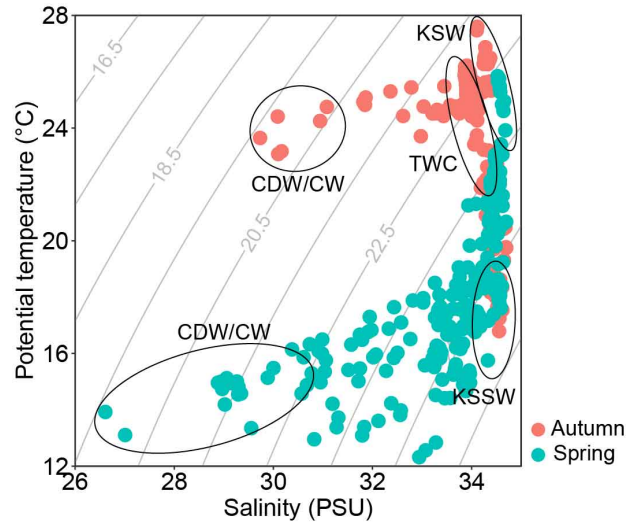

Figure S1. Plot of potential temperature and salinity at sampling depths influenced by mixing of distinct water masses in the East China Sea during autumn and spring, with isopycnal density contours (grey lines) superimposed. CDW, Changjiang diluted water; CW, Coastal water; TWC, Taiwan warm current; KSW, Kuroshio surface water; KSSW, Kuroshio subsurface water.

Table S3. Characteristics and parameter weights of each seawater type incorporated in the OMPA.

|                  | CDW/CW | TWC  | KSW  | KSSW | Weight |
|------------------|--------|------|------|------|--------|
| Autumn           |        |      |      |      |        |
| Temperature (°C) | 22.8   | 25.0 | 27.2 | 17.0 | 35.1   |
| Salinity (PSU)   | 28.4   | 33.6 | 34.4 | 34.7 | 16.3   |
| Mass             | 1      | 1    | 1    | 1    | 35.1   |
| Spring           |        |      |      |      |        |
| Temperature (°C) | 14.2   | 22.9 | 25.0 | 16.9 | 16.6   |
| Salinity (PSU)   | 26.1   | 34.3 | 34.6 | 34.7 | 7.5    |
| Mass             | 1      | 1    | 1    | 1    | 16.6   |

Note: CDW, Changjiang diluted water; CW, Coastal water; TWC, Taiwan warm current; KSW, Kuroshio surface water; KSSW, Kuroshio subsurface water.

Table S4. Summary of dataset size and univariate model performance for the MaxEnt-GAM framework.

| Phylotype            | N <sup>a</sup> | Temperature | Salinity | NO <sub>x</sub> | SRP     | DSi     | N:P     |
|----------------------|----------------|-------------|----------|-----------------|---------|---------|---------|
| <i>Trichodesmium</i> | 242            | 0.74***     | 0.65***  | 0.67***         | 0.61*** | 0.63*** | 0.66*** |
| Het-1                | 60             | 0.88***     | 0.72***  | 0.83***         | 0.75*** | 0.82*** | 0.82*** |
| Het-2                | 134            | 0.77***     | 0.69***  | 0.77***         | 0.72*** | 0.77*** | 0.76*** |
| UCYN-A1              | 67             | 0.77***     | 0.83***  | 0.85***         | 0.71*** | 0.82*** | 0.84*** |
| UCYN-A2/A3/A4        | 38             | 0.75***     | 0.85***  | 0.88***         | 0.70*** | 0.87*** | 0.89*** |
| UCYN-B               | 106            | 0.79***     | 0.73***  | 0.67***         | 0.65*** | 0.68*** | 0.71*** |
| UCYN-C               | 30             | 0.88***     | 0.88***  | 0.94***         | 0.84*** | 0.81*** | 0.86*** |
| $\gamma$ -24774A11   | 153            | 0.82***     | 0.68***  | 0.75***         | 0.70*** | 0.74*** | 0.76*** |

Note: <sup>a</sup> Number of data points used for the MaxEnt-GAM framework. \*  $p < 0.05$ , \*\*  $p < 0.01$ , \*\*\*  $p < 0.001$ .

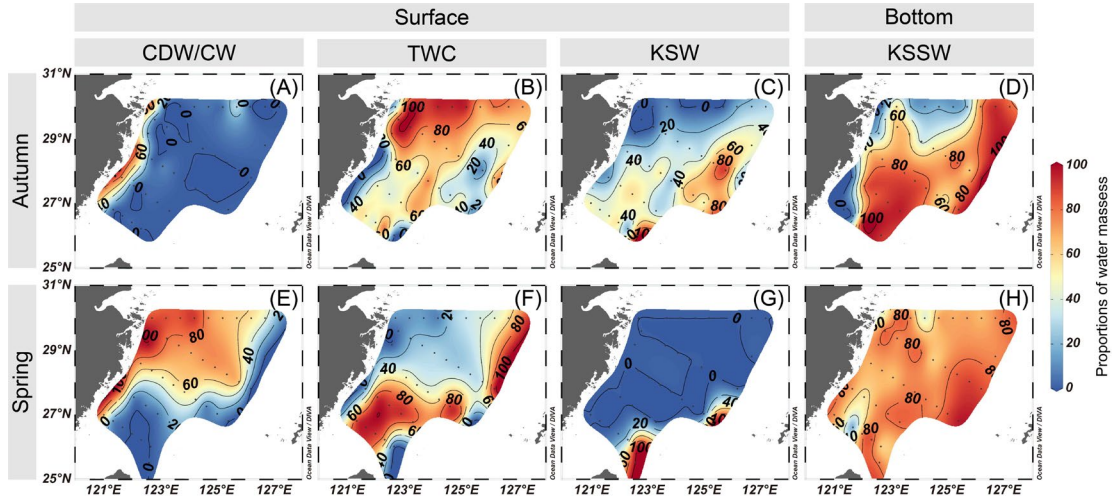

Figure S2. Proportions of water masses in the surface and bottom layers in the East China Sea during autumn (A–D) and spring (E–H) as determined with OMPA. CDW, Changjiang diluted water; CW, Coastal water; TWC, Taiwan warm current; KSW, Kuroshio surface water; KSSW, Kuroshio subsurface water. The map was created using Ocean Data View 5.7.2 (Schlitzer, Reiner, Ocean Data View, <https://odv.awi.de>, last access: 24 January 2025).

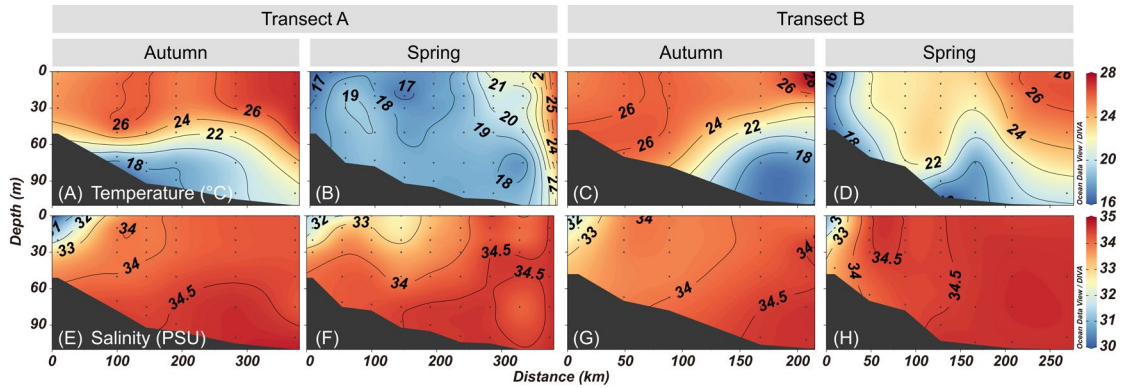

Figure S3. Vertical distributions in temperature (A–D) and salinity (E–H) along the transects A (stations 22–30) and B (stations 36–42) in the East China Sea during autumn and spring. The transect plots were created using Ocean Data View 5.7.2 (Schlitzer, Reiner, Ocean Data View, <https://odv.awi.de>, last access: 24 January 2025).

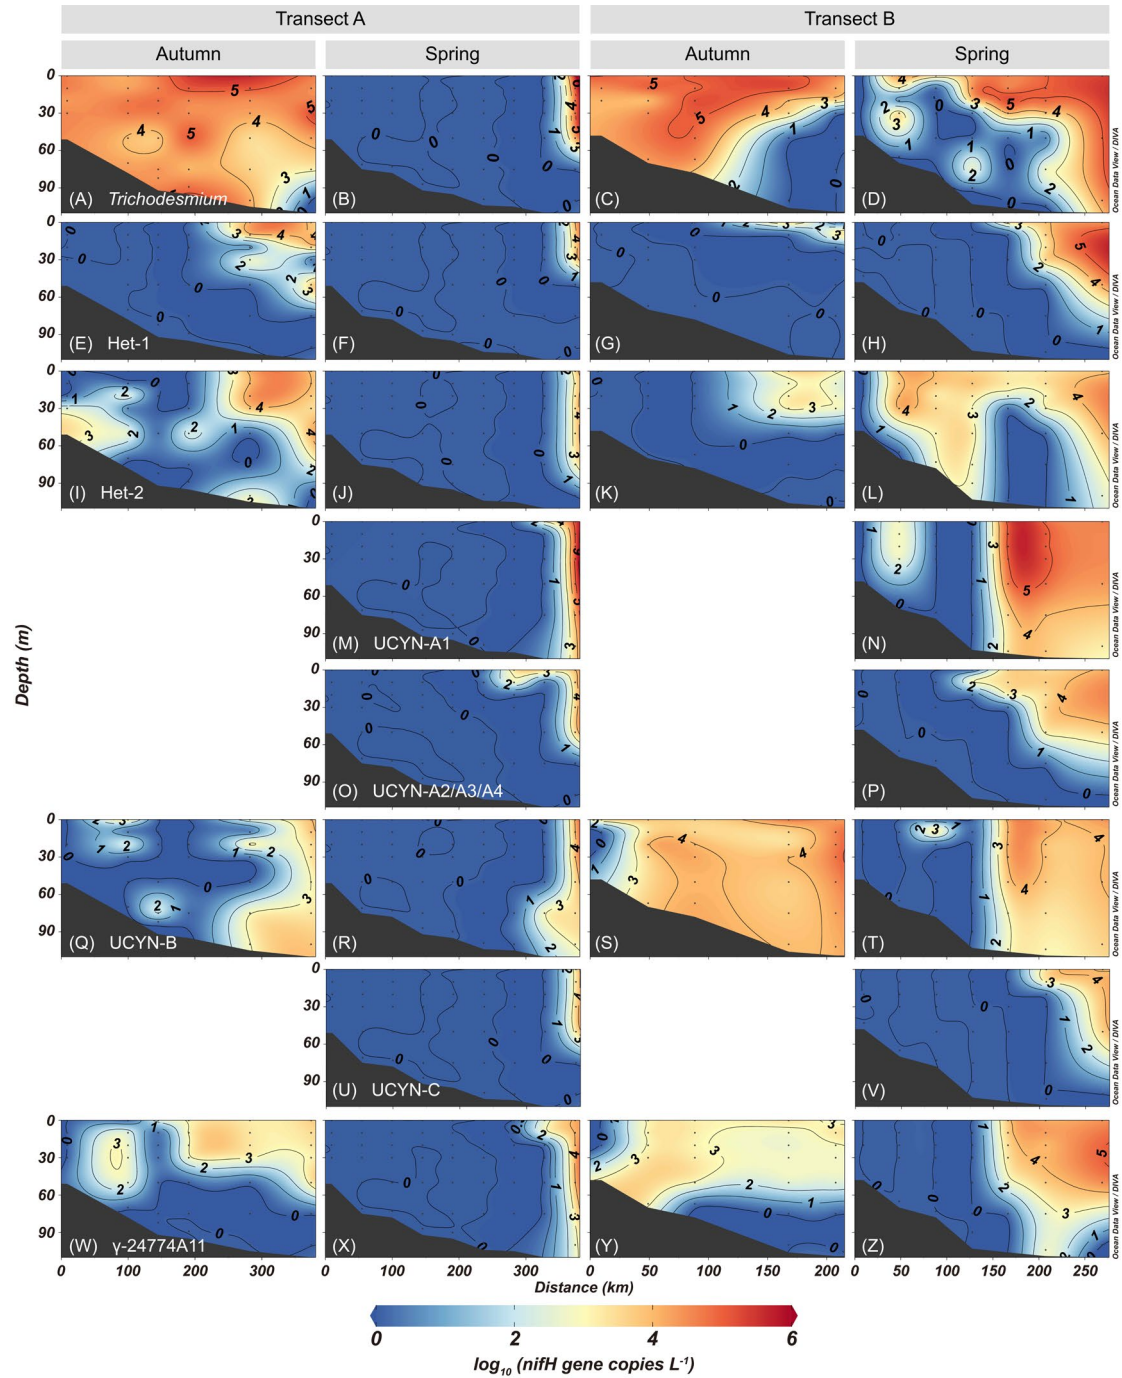

Figure S4. Vertical distributions in the abundances (Log<sub>10</sub> transformation) of the eight major diazotrophic phylotypes along the transects A (stations 22–30) and B (stations 36–42) in the East China Sea during autumn and spring as determined with TaqMan qPCR assay of the *nifH* gene. Note that UCYN-A1, UCYN-A2/A3/A4 and UCYN-C were undetectable along the transects A and B during autumn. The transect plots were created using Ocean Data View 5.7.2 (Schlitzer, Reiner, Ocean Data View, <https://odv.awi.de>, last access: 24 January 2025).





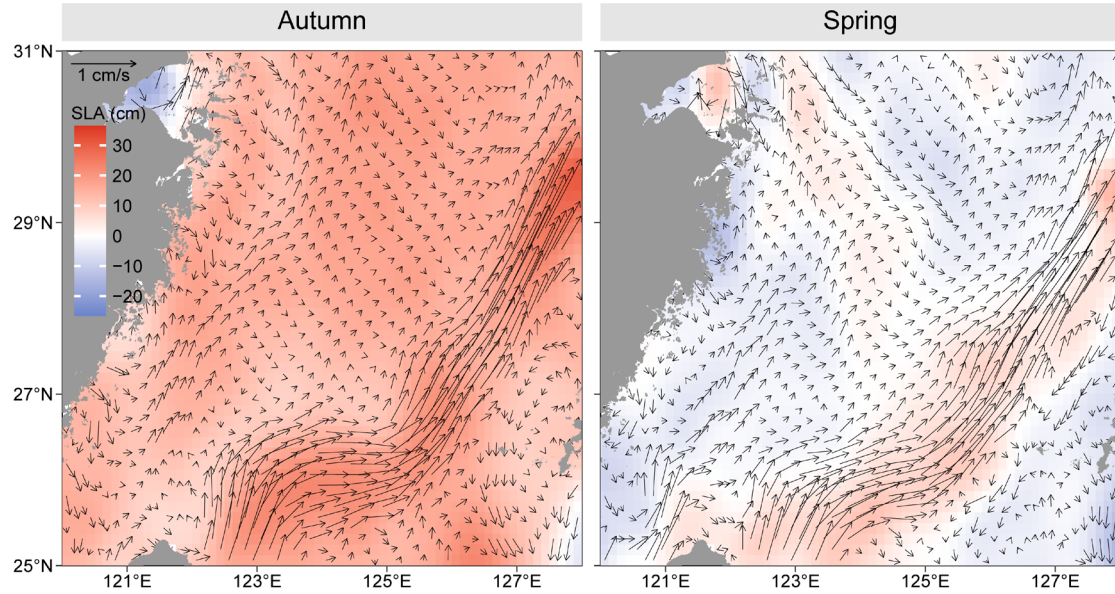

Figure S7. Average sea level anomaly (SLA, cm) and geostrophic current vectors (arrows) in the East China Sea during autumn and spring cruises. The SLA and current data were obtained from Copernicus Marine and Environment Monitoring Service website (<http://marine.copernicus.eu/>), and land topography was obtained from the General Bathymetric Chart of the Oceans (GEBCO, <https://www.gebco.net/>, last access: 24 January 2025).

Table S6. The estimated  $N_2$  fixation rate (NFR) in the East China Sea during autumn and spring derived from polyploidy factor, cell-specific NFR and the targeted diazotroph abundances. The NFRs are shown as mean  $\pm$  standard deviation.

| Phylotype            | Polyploidy factor | Cell-specific NFR (fmol N cell <sup>-1</sup> d <sup>-1</sup> ) | Autumn NFR                                |                                                 | Spring NFR                                |                                                 |
|----------------------|-------------------|----------------------------------------------------------------|-------------------------------------------|-------------------------------------------------|-------------------------------------------|-------------------------------------------------|
|                      |                   |                                                                | Surface                                   | Depth integrated                                | Surface                                   | Depth integrated                                |
|                      |                   |                                                                | (nmol N L <sup>-1</sup> d <sup>-1</sup> ) | ( $\mu$ mol N m <sup>-2</sup> d <sup>-1</sup> ) | (nmol N L <sup>-1</sup> d <sup>-1</sup> ) | ( $\mu$ mol N m <sup>-2</sup> d <sup>-1</sup> ) |
| <i>Trichodesmium</i> | 12                | 53                                                             | 0.73 $\pm$ 0.73                           | 15.49 $\pm$ 12.15                               | 0.11 $\pm$ 0.43                           | 2.58 $\pm$ 8.67                                 |
| Het-1                | 2.6               | 216                                                            | 0.30 $\pm$ 0.84                           | 7.10 $\pm$ 17.36                                | 0.09 $\pm$ 0.35                           | 3.97 $\pm$ 19.10                                |
| Het-2                | 2.6               | 216                                                            | 0.18 $\pm$ 0.48                           | 10.42 $\pm$ 22.46                               | 0.09 $\pm$ 0.22                           | 4.45 $\pm$ 11.74                                |
| UCYN-A1              | 14                | 2.7                                                            | 0.00009                                   | 0.007                                           | 0.002 $\pm$ 0.01                          | 0.11 $\pm$ 0.38                                 |
| UCYN-A2              | 14                | 55                                                             | —                                         | 0.01 $\pm$ 0.04                                 | 0.01 $\pm$ 0.01                           | 0.14 $\pm$ 0.38                                 |
| UCYN-B               | 3.6               | 12.4                                                           | 0.02 $\pm$ 0.04                           | 0.86 $\pm$ 2.16                                 | 0.01 $\pm$ 0.02                           | 0.28 $\pm$ 0.86                                 |
| UCYN-C               | 1                 | 92.4                                                           | —                                         | —                                               | 0.04 $\pm$ 0.16                           | 1.79 $\pm$ 8.37                                 |
| $\gamma$ -24774A11   | 1                 | 162.5                                                          | 0.23 $\pm$ 0.39                           | 10.26 $\pm$ 16.18                               | 0.26 $\pm$ 0.80                           | 16.19 $\pm$ 63.48                               |

Note: Average polyploidy factors for each diazotrophic phylotype were obtained from Shao et al. (2023) to convert cell-specific NFRs to *nifH*-specific rates. To avoid underestimating the contributions of *Trichodesmium* and Hets to NFRs, which exhibit high variability in cellular *nifH* copy numbers, moderate polyploidy factors were applied. For UCYN-C and  $\gamma$ -24774A11, a polyploidy factor of 1 was assumed due to limited data. Cell-specific NFRs for most phylotypes were calculated as means from published datasets (Shao et al., 2023). Cell-specific NFR for UCYN-C was derived from the average  $^{15}N_2$  assimilation rates reported for its host *Epithemia pelagica*, normalized to a 15-hour daily fixation period (Schvarcz et al., 2022). For  $\gamma$ -24774A11, the cell-specific NFR was estimated based on the average NFR of the symbiosis with its diatom host, assuming one host diatom per four  $\gamma$ -24774A11 cells (Tschitschko et al., 2024). — no data.



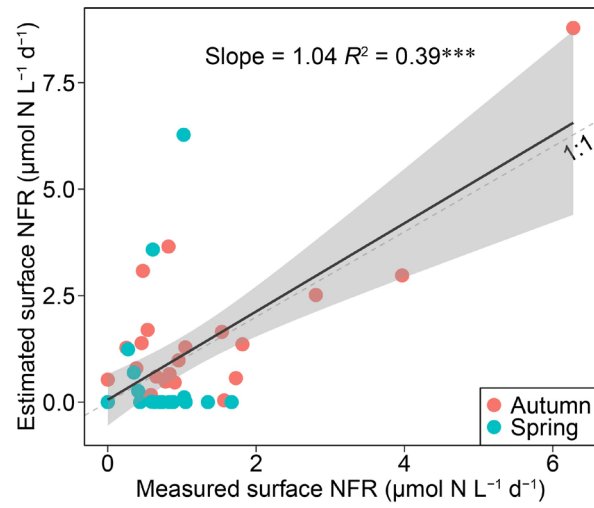

Figure S8. Linear regression of estimated versus measured surface  $\text{N}_2$  fixation rates (NFRs). Estimates were derived from cell-specific NFRs, *nifH* gene polyploidy, and phylotype-specific *nifH* gene abundance. The shaded area represents the 95% confidence interval.

## References

- Church, M., Jenkins, B., Karl, D., and Zehr, J.: Vertical distributions of nitrogen-fixing phylotypes at Stn ALOHA in the oligotrophic North Pacific Ocean, *Aquat. Microb. Ecol.*, 38, 3–14, <https://doi.org/10.3354/ame038003>, 2005a.
- Church, M. J., Short, C. M., Jenkins, B. D., Karl, D. M., and Zehr, J. P.: Temporal patterns of nitrogenase gene (*nifH*) expression in the oligotrophic North Pacific Ocean, *Appl. Environ. Microbiol.*, 71, 5362–5370, <https://doi.org/10.1128/AEM.71.9.5362-5370.2005>, 2005b.
- Foster, R. A., Subramaniam, A., Mahaffey, C., Carpenter, E. J., Capone, D. G., and Zehr, J. P.: Influence of the Amazon River plume on distributions of free-living and symbiotic cyanobacteria in the western tropical north Atlantic Ocean, *Limnol. Oceanogr.*, 52, 517–532, <https://doi.org/10.4319/lo.2007.52.2.0517>, 2007.
- Langlois, R. J., Hümmel, D., and LaRoche, J.: Abundances and distributions of the dominant *nifH* phylotypes in the northern Atlantic Ocean, *Appl. Environ. Microbiol.*, 74, 1922–1931, <https://doi.org/10.1128/AEM.01720-07>, 2008.
- Moisander, P. H., Beinart, R. A., Voss, M., and Zehr, J. P.: Diversity and abundance of diazotrophic microorganisms in the South China Sea during intermonsoon, *ISME J.*, 2, 954–967, <https://doi.org/10.1038/ismej.2008.51>, 2008.
- Moisander, P. H., Beinart, R. A., Hewson, I., White, A. E., Johnson, K. S., Carlson, C. A., Montoya, J. P., and Zehr, J. P.: Unicellular cyanobacterial distributions broaden the oceanic N<sub>2</sub> fixation domain, *Science*, 327, 1512–1514, <https://doi.org/10.1126/science.1185468>, 2010.
- Schvarcz, C. R., Wilson, S. T., Caffin, M., Stancheva, R., Li, Q., Turk-Kubo, K. A., White, A. E., Karl, D. M., Zehr, J. P., and Steward, G. F.: Overlooked and widespread pennate diatom-diazotroph symbioses in the sea, *Nat. Commun.*, 13, 799, <https://doi.org/10.1038/s41467-022-28065-6>, 2022.
- Shao, Z., Xu, Y., Wang, H., Luo, W., Wang, L., Huang, Y., Agawin, N. S. R., Ahmed, A., Benavides, M., Bentzon-Tilia, M., Berman-Frank, I., Berthelot, H., Biegala, I. C., Bif, M. B., Bode, A., Bonnet, S., Bronk, D. A., Brown, M. V., Campbell, L., Capone, D. G., Carpenter, E. J., Cassar, N., Chang, B. X., Chappell, D., Chen, Y. L., Church, M. J., Cornejo-Castillo, F. M., Detoni, A. M. S., Doney, S. C., Dupouy, C., Estrada, M., Fernandez, C., Fernández-Castro, B., Fonseca-Batista, D., Foster, R. A., Furuya, K., Garcia, N., Goto, K., Gago, J., Gradoville, M. R., Hamersley, M. R., Henke, B. A., Hörstmann, C., Jayakumar, A., Jiang, Z., Kao, S.-J., Karl, D. M., Kittu, L. R., Knapp, A. N., Kumar, S., LaRoche, J., Liu, H., Liu, J., Lory, C., Löscher, C. R., Maraño, E., Messer, L. F., Mills, M. M., Mohr, W., Moisander, P. H., Mahaffey, C., Moore, R., Mouriño-Cáballido, B., Mulholland, M. R., Nakaoka, S., Needoba, J. A., Raes, E. J., Rahav, E., Ramírez-Cárdenas, T., Reeder, C. F., Riemann, L., Riou, V., Robidart, J. C., Sarma, V. V. S. S., Sato, T., Saxena, H., Selden, C., Seymour, J. R., Shi, D., Shiozaki, T., Singh, A., Sipler, R. E., Sun, J., Suzuki, K., Takahashi, K., Tan, Y., Tang, W., Tremblay, J.-É., Turk-Kubo, K., Wen, Z., White, A. E., Wilson, S. T., Yoshida, T., Zehr, J. P., Zhang, R., Zhang, Y., and Luo, Y.-W.: Global oceanic diazotroph database version 2 and elevated estimate of global oceanic N<sub>2</sub> fixation, *Earth Syst. Sci. Data*, 15, 3673–3709, <https://doi.org/10.5194/essd-15-3673-2023>, 2023.
- Thompson, A., Carter, B. J., Turk-Kubo, K., Malfatti, F., Azam, F., and Zehr, J. P.: Genetic diversity of the unicellular nitrogen-fixing cyanobacteria UCYN-A and its prymnesiophyte host: UCYN-A genetic diversity, *Environ. Microbiol.*, 16, 3238–3249, <https://doi.org/10.1111/1462-2920.12490>, 2014.

Tschitschko, B., Esti, M., Philippi, M., Kidane, A. T., Littmann, S., Kitzinger, K., Speth, D. R., Li, S., Kraberg, A., Tienken, D., Marchant, H. K., Kartal, B., Milucka, J., Mohr, W., and Kuypers, M. M. M.: Rhizobia–diatom symbiosis fixes missing nitrogen in the ocean, *Nature*, 630, 899–904, <https://doi.org/10.1038/s41586-024-07495-w>, 2024.
